# Supplementary material for: Economic Valuation for Cultural and Passive Ecosystem Services Using a Stated Preference (Contingent Valuation Method (CVM)) Case of the Elgeyo Watershed Ecosystem, Kenya
Source: Hindawi journal article supplement (doi:10.1155/2021/5867745), 2021-08-14
Supplement: f1 [file 5867745.f1.zip]

Archive with 2 entries (2 files):
- 5867745.f1/Contingent_Valuation_Data_Elgeyowatershed.txt
- 5867745.f1/Contingent_Valuation_Data_Elgeyowatershed.txt2.txt
