# Supplementary material for: Economic Valuation for Cultural and Passive Ecosystem Services Using a Stated Preference (Contingent Valuation Method (CVM)) Case of the Elgeyo Watershed Ecosystem, Kenya
Source: Hindawi journal article supplement (doi:10.1155/2021/5867745), 2021-08-14
Supplement: f1 [file 5867745.f1.zip › 5867745.f1/Contingent_Valuation_Data_Elgeyowatershed.txt]

ID	Date	Longitude	Latitude	Altitude	Category	Description	Sender Name	Registered Name	County	Sub-County	Ward	Location	Sub-Location	Village	Interviewer	Supervisor	Mob. No	Name	Mob. No2	Gender	Age	Relation to HHH	Marital Status	Education	Main Occupation	HH Leadership	Born in The Area	Period Lived in Area	Ethnic Group	Male	Female	Children	Total HH Size	Land Size	Natural Forest (NF)	Size of NF(Acres)	P (%)NF Land	Wood Lot (WT)	Size of WL Land	P(%) WL Land	Food Crop (FC) Production	Land Size of FC	P(%) of FC Land	Cash Crop (CC) Production	Land Size of CC	P(%) CC Land	Settlements (S)	Land Size for S	P(%) of S Land
175427	16/01/2021 16:57	35.51533833	0.671898333	2303.1	Questionnaire	The farm is small scale		Sylvia Cherop	Elgeiyo Marakwet	Keiyo North	Kapchemutwa	Irong	Iten	Iten	Sylvia Cherop	Justus	723805913			Male	39	Parent	Married	Primary	Crop farmer	Male headed, male managed	No	10	Kisii	1	1	2	4	1	No			Yes	0.03	2.50%	Yes	0.25	25.00%	No			No
175428	16/01/2021 14:36	35.515315	0.672126667	2308.3	Questionnaire	Its a small farm		Sylvia Cherop	Elgeiyo Marakwet	Keiyo North	Kapchemutwa	Irong	Iten	Iten	Sylvia Cherop	Justus	723805913			Male	50	Parent	Married	Secondary	Business	Male headed, male managed	Yes	50	Kalenjin	2	2	3	7	1	No			Yes	0.25	25.00%	No			No			Yes	0.25	25.00%
175429	16/01/2021 14:21	35.51559833	0.673418333	2320.7	Questionnaire	Its a small scale farm		Sylvia Cherop	Elgeiyo Marakwet	Keiyo North	Kapchemutwa	Irong	Iten	Iten	Sylvia Cherop	Justus	723805913			Male	39	Parent	Married	Tertiary	Business	Male headed, male managed	Yes	39	Kalenjin	2	3	3	8	1.5	No			Yes	0.25	16.70%	No			No			No
175430	16/01/2021 14:14	35.515795	0.672411667	2311.5	Questionnaire	Its a small scale farm		Sylvia Cherop	Elgeiyo Marakwet	Keiyo North	Kapchemutwa	Irong	Iten	Iten	Sylvia Cherop	Justus	723805913			Male	49	Parent	Married	Tertiary	Business	Male headed, male managed	Yes	49	Kalenjin	2	3	5	10	2	No			No			Yes	0.5	25.00%	No			No
175431	16/01/2021 14:03	35.51577	0.67243	2311.6	Questionnaire	Its a small scale farm		Sylvia Cherop	Elgeiyo Marakwet	Keiyo North	Kapchemutwa	Irong	Iten	Iten	Sylvia	Justus	723805913			Male	52	Parent	Married	Primary	Crop farmer	Male headed, male managed	Yes	52	Kalenjin	1	1	4	6	2	No			Yes	0.25	12.50%	Yes	0.5	25.00%	No			No
175432	16/01/2021 13:46	35.51253833	0.671045	2347.6	Questionnaire	Its a small scale farm		Sylvia Cherop	Elgeiyo Marakwet	Keiyo North	Kapchemutwa	Irong	Iten	Iten	Sylvia Cherop	Justus	723805913	Mark motoi		Male	47	Parent	Married	Primary	Crop farmer	Male headed, male managed	No	15	Luhya	1	1	5	7	1	No			No			No			No			No
175433	16/01/2021 13:15	35.51277333	0.67244	2354	Questionnaire	Its a small farm		Sylvia Cherop	Elgeiyo Marakwet	Keiyo North	Kapchemutwa	Irong	Iten	Iten	Sylvia Cherop	Justus	723805913			Female	53	Parent	Married	Secondary	Business	Male headed, male managed	Yes	53	Kalenjin	2	2	2	6	2	No			Yes	0.25	12.50%	Yes	0.5	25.00%	No			No
175434	16/01/2021 13:11	35.51191667	0.671716667	2361.8	Questionnaire	Its a small scale farm		Sylvia Cherop	Elgeiyo Marakwet	Keiyo North	Kapchemutwa	Irong	Iten	Iten	Sylvia Cherop	Justus	723805913			Male	45	Parent	Married	Primary	Business	Male headed, male managed	Yes	45	Kalenjin	1	1	2	4	1	No			No			Yes	0.25	25.00%	No			No
175435	16/01/2021 12:37	35.50979667	0.67267	2358.5	Questionnaire	Its a small farm		Sylvia Cherop	Elgeiyo Marakwet	Keiyo North	Kapchemutwa	Irong	Iten	Iten	Sylvia Cherop	Justus	723805913			Male	49	Parent	Married	Tertiary	Business	Male headed, male managed	Yes	49	Kalenjin	1	1	2	4	1	No			Yes	0.25	25.00%	No			No			No
175436	15/01/2021 17:24	35.50799667	0.6754	2348.7	Questionnaire	Its a small scale farm		Sylvia Cherop	Elgeiyo Marakwet	Keiyo North	Kapchemutwa	Irong	Iten	Iten	Sylvia Cherop	Justus	723805913			Female	48	Parent	Married	Secondary	Crop farmer	Male headed, male managed	No	18	Kalenjin	2	1	1	4	2	No			Yes	0.25	12.50%	Yes	0.5	25.00%	No			No
175437	15/01/2021 16:44	35.50466833	0.6713	2378.6	Questionnaire	Its a small farm		Sylvia Cherop	Elgeiyo Marakwet	Keiyo North	Kapchemutwa	Irong	Iten	Iten	Sylvia Cherop	Justus	723805913	Joyce Bett		Female	56	Parent	Married	Primary	Business	Male headed, male managed	No	35	Gikuyu	3	1	4	8	2	No			Yes	0.03	1.30%	Yes	0.5	25.00%	No			No
175438	15/01/2021 14:17	35.50484333	0.671536667	2361.6	Questionnaire	Its a small scale farm		Sylvia Cherop	Elgeiyo Marakwet	Keiyo North	Kapchemutwa	Irong	Iten	Iten	Sylvia Cherop	Justus	723805913			Male	52	Parent	Married	Primary	Crop farmer	Male headed, male managed	Yes	52	Kalenjin	3	3	2	8	3	No			Yes	0.25	8.30%	Yes	1	33.30%	No			No
175439	15/01/2021 13:31	35.50429	0.670451667	2361.7	Questionnaire	Its a small scale farm		Sylvia Cherop	Elgeiyo Marakwet	Keiyo North	Kapchemutwa	Irong	Iten	Iten	Sylvia Cherop	Justus	723805913			Male	53	Parent	Married	Secondary	Crop farmer	Male headed, male managed	Yes	53	Kalenjin	2	1	3	6	2	No			No			Yes	0.5	25.00%	No			No
175440	15/01/2021 13:14	35.49946833	0.670656667	2336.7	Questionnaire	Its a small scale farm		Sylvia Cherop	Elgeiyo Marakwet	Keiyo North	Kapchemutwa	Irong	Iten	Iten	Sylvia Cherop	Justus	723805913			Male	44	Parent	Married	Secondary	Business	Male headed, male managed	Yes	44	Kalenjin	2	1	3	6	2.25	No			Yes	0.25	11.10%	Yes	0.5	22.20%	No			Yes	0.25	11.10%
175441	15/01/2021 13:00	35.50154333	0.670788333	2353.4	Questionnaire	The land is small scale with agroforestry trees.		Sylvia Cherop	Elgeiyo Marakwet	Keiyo North	Kapchemutwa	Irong	Iten	Iten	Sylvia Cherop	Justus	723805913			Male	47	Parent	Married	Primary	Crop farmer	Male headed, male managed	Yes	47	Kalenjin	2	1	3	6	2	No			No			Yes	0.5	25.00%	No			No
175424	15/01/2021 12:53	35.50153167	0.670788333	2352.3	Questionnaire	Its a small scale farm		Sylvia Cherop	Elgeiyo Marakwet	Keiyo North	Kapchemutwa	Irong	Iten	Iten	Sylvia Cherop	Justus	723805913			Female	40	Parent	Married	Secondary	Crop farmer	Male headed, male managed	Yes	40	Kalenjin	1	1	2	4	2	No			Yes	0.25	12.50%	Yes	0.5	25.00%	No			No
175425	15/01/2021 12:44	35.50354333	0.669928333	2361.8	Questionnaire	Its a small scale farm		Sylvia Cherop	Elgeiyo Marakwet	Keiyo North	Kapchemutwa	Irong	Iten	Iten	Sylvia Cherop	Justus	723805913			Female	39	Parent	Married	Secondary	Business	Male headed, male managed	Yes	39	Kalenjin	1	1	2	5	1	No			No			No			No			No
175426	15/01/2021 12:30	35.50361333	0.671756667	2357	Questionnaire	Its a small scale farm		Sylvia Cherop	Elgeiyo Marakwet	Keiyo North	Kapchemutwa	Irong	Iten	Iten	Sylvia Cherop	Justus	723805913			Male	42	Parent	Married	Secondary	Crop farmer	Male headed, male managed	Yes	42	Kalenjin	1	2	2	5	3.5	No			No			No			No			No
175423	15/01/2021 12:16	35.50168833	0.673348333	2350.3	Questionnaire	Its a small scale farm		Sylvia Cherop	Elgeiyo Marakwet	Keiyo North	Kapchemutwa	Irong	Iten	Iten	Sylvia Cherop	Justus	723805913			Male	50	Grandchild	Married	Primary	Crop farmer	Male headed, male managed	Yes	50	Kalenjin	2	3	4	9	3	No			Yes	0.5	16.70%	Yes	1	33.30%	No			No
174231	14/01/2021 16:02	35.48158667	0.640416667	2321.7	Questionnaire	A small scale farm		Sylvia Cherop	Elgeiyo Marakwet	Keiyo North	Kapchemutwa	Irong	Katalel	Katalel	Sylvia Cherop	Justus	723805913			Male	69	Parent	Married	None	Crop farmer	Male headed, male managed	Yes	69	Kalenjin	3	2	2	7	4	No			No			Yes	2	50.00%	No			No
174232	14/01/2021 15:41	35.48158833	0.640386667	2321.9	Questionnaire	Its a small scale farm		Sylvia Cherop	Elgeiyo Marakwet	Keiyo North	kapchemutwa	Irong	Katalel	Katalel	Sylvia Cherop	Justus	723805913	Mercy Cherono Biwot		Female	47	Parent	Married	Tertiary	Business	Male headed, male managed	No	13	Turkana	2	2	3	7	6	No			Yes	0.5	8.30%	Yes	2	33.30%	No			No
174233	14/01/2021 15:16	35.47447333	0.639343333	2324.7	Questionnaire	Its a small scale farm		Sylvia Cherop	Elgeiyo Marakwet	Keiyo North	Kapchemutwa	Irong	Katalel	Katalel	Sylvia Cherop	Justus	723805913			Male	63	Parent	Married	Secondary	Crop farmer	Male headed, male managed	Yes	63	Kalenjin	2	1	2	6	7	No			Yes	0.25	3.60%	Yes	1.5	21.40%	No			No
174234	14/01/2021 14:57	35.47145167	0.639635	2321	Questionnaire	Its a small farm		Sylvia Cherop	Elgeiyo Marakwet	Keiyo North	Kapchemutwa	Irong	Katalel	Katalel	Sylvia Cherop	Justus	723805913			Male	53	Parent	Married	None	Crop farmer	Male headed, male managed	Yes	53	Kalenjin	3	2	2	7	6	No			Yes	0.5	8.30%	Yes	2	33.30%	No			No
174235	14/01/2021 14:28	35.47847833	0.638298333	2340.4	Questionnaire	Its a small scale farm		Sylvia Cherop	Elgeiyo Marakwet	Keiyo North	Kapchemutwa	Irong	Katalel	Katalel	Sylvia Cherop	Justus	723805913	Chebii kwemoi		Male	46	Parent	Married	Primary	Crop farmer	Male headed, male managed	Yes	46	Kalenjin	1	1	4	6	4	No			No			Yes	1.5	37.50%	No			No
174236	14/01/2021 14:05	35.46942833	0.634703333	2327.3	Questionnaire	Its a small scale farm		Sylvia Cherop	Elgeiyo Marakwet	Keiyo North	Kapchemutwa	Irong	Katalel	Katalel	Sylvia Cherop	Justus	723805913			Male	68	Parent	Married	Secondary	Crop farmer	Male headed, male managed	Yes	68	Kalenjin	2	2	5	9	6	No			Yes	0.5	8.30%	Yes	2	33.30%	No			No
174237	14/01/2021 13:44	35.46938833	0.63466	2322.5	Questionnaire	Its a small farm		Sylvia Cherop	Elgeiyo Marakwet	Keiyo North	Kapchemutwa	Irong	Katalel	Katalel	Sylvia Cherop	Justus	723805913			Female	44	Parent	Married	Secondary	Crop farmer	Male headed, male managed	Yes	44	Kalenjin	1	1	3	5	4	No			Yes	0.25	6.30%	Yes	1.5	37.50%	No			No
174238	14/01/2021 12:34	35.47003333	0.631081667	2308.7	Questionnaire	Its a small scale farm		Sylvia Cherop	Elgeiyo Marakwet	Keiyo North	Kapchemutwa	Irong	Katalel	Katalel	Sylvia Cherop	Justus	723805913			Female	45	Parent	Married	Primary	Crop farmer	Male headed, male managed	No	15	Kalenjin	1	3	4	8	4	No			Yes	0.25	6.30%	Yes	1.5	37.50%	No			No
174239	14/01/2021 12:06	35.47079167	0.630885	2304.6	Questionnaire	A small scale farm		Sylvia Cherop	Elgeiyo Marakwet	Keiyo North	Kapchemutwa	Irong	Katalel	Katalel	Sylvia Cherop	Justus	723805913	Charles sirma		Male	55	Parent	Married	Primary	Crop farmer	Male headed, male managed	Yes	55	Kalenjin	2	1	4	7	6	No			Yes			Yes	2	33.30%	No			No
174240	14/01/2021 11:56	35.47403	0.62995	2303.4	Questionnaire	The farm is small scale		Sylvia Cherop	Elgeiyo Marakwet	Keiyo North	Kapchemutwa	Irong	Katalel	Katalel	Sylvia Cherop	Justus	723805913	Peter Chumba		Male	56	Parent	Married	None	Crop farmer	Male headed, male managed	Yes	56	Kalenjin	3	2	4	9	7	No			Yes			Yes	2	28.60%	No			No
174241	14/01/2021 11:41	35.47718667	0.63059	2311.3	Questionnaire	Its small scale farm		Sylvia Cherop	Elgeiyo Marakwet	Keiyo North	Kapchemutwa	Irong	Katalel	Katalel	Sylvia Cherop	Justus	723805913			Female	45	Parent	Married	Secondary	Crop farmer	Male headed, male managed	No	15	Kalenjin	1	2	3	6	6	No			Yes	0.5	8.30%	Yes	2	33.30%	No			No
173860	13/01/2021 17:17	35.502155	0.663578333	2362.3	Questionnaire	Its a small scale farm		Sylvia Cherop	Elgeiyo Marakwet	Keiyo North	Kapchemutwa	Irong	Kiptabus	Kiptabus	Sylvia Cherop	Justus	723805913			Female	49	Parent	Married	Secondary	Business	Male headed, male managed	Yes	49	Kalenjin	3	2	2	7	6	No			Yes	0.25	4.20%	Yes	1.5	25.00%	No			No
173861	13/01/2021 17:01	35.493925	0.665703333	2339.8	Questionnaire	Its a small scale farm		Sylvia Cherop	Elgeiyo Marakwet	Keiyo North	Kapchemutwa	Irong	Kiptabus	Kiptabus	Sylvia Cherop	Justus	723805913			Male	50	Parent	Married	Primary	Crop farmer	Male headed, male managed	Yes	50	Kalenjin	1	2	5	8	8	No			Yes	0.25	3.10%	Yes	2	25.00%	No			No
173862	13/01/2021 16:37	35.486625	0.669976667	2325.2	Questionnaire	Its a small scale farm		Sylvia Cherop	Elgeiyo Marakwet	Keiyo North	Kapchemutwa	Irong	Kiptabus	Kiptabus	Sylvia Cherop	Justus	723805913			Male	43	Parent	Married	Primary	Crop farmer	Male headed, male managed	Yes	43	Kalenjin	1	1	5	3	7	No			Yes	0.5	7.10%	Yes	2	28.60%	No			No
173863	13/01/2021 16:12	35.48661667	0.669978333	2326.5	Questionnaire	Its a small scale farm		Sylvia Cherop	Elgeiyo Marakwet	Keiyo North	Kapchemutwa	Irong	Kiptabus	Kiptabus	Sylvia Cherop	Justus	723805913	Jael		Female	45	Parent	Married	Secondary	Business	Male headed, male managed	No	15	Kalenjin	2	1	3	5	6	No			Yes	0.25	4.20%	Yes	1.5	25.00%	No			No
173864	13/01/2021 15:55	35.48700333	0.67157	2326.5	Questionnaire	Its a small scale farm		Sylvia Cherop	Elgeiyo Marakwet	Keiyo North	Kapchemutwa	Irong	Kiptabus	Kiptabus	Sylvia Cherop	Justus	723805913			Female	45	Parent	Married	Primary	Crop farmer	Male headed, male managed	Yes	45	Kalenjin	1	1	4	6	4	No			Yes	0.25	6.30%	Yes	1.5	37.50%	No			No
173865	13/01/2021 13:21	35.48173	0.66826	2321.7	Questionnaire	A small scale farm		Sylvia Cherop	Elgeiyo Marakwet	Keiyo North	Kapchemutwa	Irong	Kiptabus	Kiptabus	Sylvia Cherop	Justus	723805913	Mary kigen		Female	53	Parent	Married	None	Crop farmer	Male headed, male managed	No	30	Kalenjin	1	2	3	5	4	No			Yes	0.25	6.30%	Yes	1	25.00%	No			No
173866	13/01/2021 13:10	35.477185	0.671716667	2303.6	Questionnaire	Its a small scale farm		Sylvia Cherop	Elgeiyo Marakwet	Keiyo North	Kapchemutwa	Irong	Kiptabus	Kiptabus	Sylvia Cherop	Justus	723805913	Daniel		Male	60	Parent	Married	Primary	Crop farmer	Male headed, male managed	Yes	60	Kalenjin	1	1	4	6	8	No			Yes	0.5	6.30%	Yes	3	37.50%	No			No
173867	13/01/2021 13:07	35.47650333	0.672151667	2298.9	Questionnaire	Its a small scale farm		Sylvia Cherop	Elgeiyo Marakwet	Keiyo North	Kapchemutwa	Irong	Kiptabus	Kiptabus	Sylvia Cherop	Justus	7238805913			Male	56	Parent	Married	None	Crop farmer	Male headed, male managed	Yes	56	Kalenjin	1	2	2	5	3	No			Yes	0.5	16.70%	Yes	1	33.30%	No			No
173868	13/01/2021 13:05	35.477515	0.671453333	2305	Questionnaire	Its a small scale farm		Sylvia Cherop	Elgeiyo Marakwet	Keiyo North	Kapchemutwa	Irong	Kiptabus	Kiptabus	Sylvia Cherop	Justus	723805913	Juliet		Female	35	Parent	Married	Secondary	Crop farmer	Male headed, male managed	Yes	35	Kalenjin	1	1	2	4	2	No			Yes	0.25	12.50%	Yes	0.5	25.00%	No			No
173869	13/01/2021 12:59	35.47767833	0.670788333	2311.3	Questionnaire	Its a small scale farm		Sylvia Cherop	Elgeiyo Marakwet	Keiyo North	Kapchemutwa	Irong	Kiptabus	Kiptabus	Sylvia Cherop	Justus	723805913			Male	46	Parent	Married	Secondary	Crop farmer	Male headed, male managed	Yes	46	Kalenjin	2	2	4	8	6	No			Yes	0.5	8.30%	Yes	1.5	25.00%	No			No
173870	13/01/2021 12:48	35.48005	0.669283333	2313.8	Questionnaire	It is a small scale farm		Sylvia Cherop	Elgeiyo Marakwet	Keiyo North	Kapchemutwa	Irong	Kiptabus	Kiptabus	Sylvia Cherop	Justus	723805913			Female	40	Parent	Married	Secondary	Crop farmer	Male headed, male managed	No	20	Kalenjin	2	1	3	6	4	No			Yes	0.25	6.30%	Yes	1.5	37.50%	No			No
173871	13/01/2021 12:22	35.48266333	0.667536667	2320.9	Questionnaire	Its a small scale farm		Sylvia Cherop	Elgeiyo Marakwet	Keiyo North	Kapchemutwa	Irong	Kiptabus	Kiptabus	Sylvia Cherop	Justus	723805913	Joel		Male	54	Parent	Married	Primary	Crop farmer	Male headed, male managed	Yes	54	Kalenjin	2	3	5	10	10	No			Yes	1	10.00%	Yes	3	30.00%	No			No
173872	13/01/2021 11:49	35.48266	0.667538333	2323.6	Questionnaire	Its a small scale farm		Sylvia Cherop	Elgeiyo Marakwet	Keiyo North	Kapchemutwa	Irong	Kiptabus	Kiptabus	Sylvia Cherop	Justus	723805913	Matthew keitany		Male	56	Parent	Married	Secondary	Crop farmer	Male headed, male managed	Yes	56	Kalenjin	2	2	3	7	8	No			No			Yes	3	37.50%	No			No
173566	12/01/2021 15:58	35.51014167	0.692375	2300.9	Questionnaire	Its a small scale farm		Sylvia Cherop	Elgeiyo Marakwet	Keiyo North	Kapchemutwa	Cheboror	Mindililwo	Mindililwo	Sylvia Cherop	Justus	723805913	Philip kisach		Male	55	Parent	Married	Primary	Crop farmer	Male headed, male managed	Yes	55	Kalenjin	1	2	3	6	2	No			Yes	0.25	12.50%	Yes	0.5	25.00%	No			No
173567	12/01/2021 14:23	35.51113167	0.691291667	2311.2	Questionnaire	Its a small scale farm		Sylvia Cherop	Elgeiyo Marakwet	Keiyo North	Kapchemutwa	Cheboror	Mindililwo	Mindililwo	Sylvia Cherop	Justus	723805913			Male	58	Parent	Married	None	Crop farmer	Male headed, male managed	Yes	58	Kalenjin	1	1	3	5	2	No			Yes	0.25	12.50%	Yes	0.5	25.00%	No			No
173568	12/01/2021 14:12	35.50791667	0.689733333	2332.3	Questionnaire	Its a small scale farm		Sylvia Cherop	Elgeiyo Marakwet	Keiyo North	Kapchemutwa	Cheboror	Mindililwo	Mindililwo	Sylvia Cherop	Justus	723805903	Magdaline		Female	30	Parent	Married	Primary	Crop farmer	Male headed, male managed	No	5	Kalenjin	1	2	3	6	2.5	No			No			Yes	0.5	20.00%	No			No
173569	12/01/2021 14:05	35.50871333	0.688856667	2325.4	Questionnaire	A small scale farm		Sylvia Cherop	Elgeiyo Marakwet	Keiyo North	Kapchemutwa	Cheboror	Mindililwo	Mindililwo	Sylvia Cherop	Justus	723805913			Female	53	Parent	Married	Primary	Crop farmer	Male headed, male managed	No	30	Kalenjin	2	3	4	9	4	No			No			No			No			No
173570	12/01/2021 13:48	35.50804167	0.688298333	2330.9	Questionnaire	Its a small scale farm		Sylvia Cherop	Elgeiyo Marakwet	Keiyo North	Kapchemutwa	Cheboror	Mindililwo	Mindililwo	Sylvia Cherop	Justus	723805913	Jane biwott		Male	39	Parent	Married	Secondary	Crop farmer	Male headed, male managed	Yes	39	Kalenjin	1	1	4	6	2	No			No			Yes	0.5	25.00%	No			No
173571	12/01/2021 13:27	35.509625	0.68384	2337	Questionnaire	Its a small scale farm		Sylvia Cherop	Elgeiyo Marakwet	Keiyo North	Kapchemutwa	Cheboror	Mindililwo	Mindililwo	Sylvia Cherop	Justus	723805913	Joshua kibet		Male	46	Parent	Married	Secondary	Crop farmer	Male headed, male managed	No	18	Kalenjin	1	1	3	5	2.5	No			No			Yes	0.5	20.00%	No			No
173572	12/01/2021 13:03	35.51281333	0.684753333	2341.6	Questionnaire	Its a small scale farm		Sylvia Cherop	Elgeiyo Marakwet	Keiyo North	Kapchemutwa	Cheboror	Mindililwo	Mindililwo	Sylvia Cherop	Justus	723805913			Female	40	Parent	Married	Primary	Crop farmer	Male headed, male managed	No	12	Kalenjin	1	1	4	6	1.5	No			Yes	0.25	16.70%	Yes	0.5	33.30%	No			No
173573	12/01/2021 12:40	35.51140667	0.683615	2336.5	Questionnaire	Its a small scale farm		Sylvia Cherop	Elgeiyo Marakwet	Keiyo North	Kapchemutwa	Cheboror	Mindililwo	Mindililwo	Sylvia Cherop	Justus	723805913	Paul		Male	50	Parent	Married	Primary	Crop farmer	Male headed, male managed	Yes	50	Kalenjin	2	2	4	8	3.5				Yes	0.5	14.30%	Yes	1	28.60%	No			No
173574	12/01/2021 12:15	35.511615	0.683585	2338.1	Questionnaire	A small scale farm		Sylvia Cherop	Elgeiyo Marakwet	Keiyo North	Kapchemutwa	Cheboror	Mindililwo	Mindililwo	Sylvia Cherop	Justus	723805913			Female		Parent	Married	Primary	Crop farmer	Male headed, male managed	Yes		Kalenjin	1	2	4	7	4.5	No			No			Yes	1.5	33.30%	No			No
173410	11/01/2021 15:47	35.49344333	0.683203333	2307	Questionnaire	A small scale farm		Sylvia Cherop	Elgeiyo Marakwet	Keiyo North	Kapchemutwa	Cheboror	Chebokokwa	Chebokokwa	Sylvia Cherop	Justus	723805913			Male	45	Parent	Married	None	Crop farmer	Male headed, male managed	Yes	45	Kalenjin	1	1	4	6	2	No			Yes	0.25	12.50%	Yes	0.5	25.00%	No			No
173411	11/01/2021 15:41	35.49397167	0.683495	2299.7	Questionnaire	A small scale farm		Sylvia Cherop	Elgeiyo Marakwet	Keiyo North	Kapchemutwa	Cheboror	Chobokokwa	Chebokokwa	Sylvia Cherop	Justus	723805913	Keino Abel		Male	40	Parent	Married	Primary	Crop farmer	Male headed, male managed	Yes	40	Kalenjin	1	1	3	5	2	No			Yes	0.25	12.50%	Yes	0.5	25.00%	No			No
173412	11/01/2021 15:36	35.49495	0.685753333	2314.8	Questionnaire	A small scale farm		Sylvia Cherop	Elgeiyo Marakwet	Keiyo North	Kapchemutwa	Cheboror	Chebokokwa	Chebokokwa	Sylvia Cherop	Justus	723805913	Jane Cherotich		Male	55	Parent	Married	Tertiary	Business	Male headed, male managed	No	20	Kalenjin	1	2	4	7	4	No			Yes	0.25	6.30%	Yes	1.5	37.50%	No			No
173413	11/01/2021 15:29	35.49472	0.688713333	2317.5	Questionnaire	A small scale farm		Sylvia Cherop	Elgeiyo Marakwet	Keiyo North	Kapchemutwa	Cheboror	Chebokokwa	Chebokokwa	Sylvia Cherop	Justus	723805913			Female	53	Parent	Married	Secondary	Crop farmer	Male headed, male managed	Yes	53	Kalenjin	2	1	2	5	2	No			Yes	0.25	12.50%	Yes	0.5	25.00%	No			No
173324	11/01/2021 14:19	35.49058333	0.683955	2311.7	Questionnaire	It is a small scale farm		Sylvia Cherop	Elgeiyo Marakwet	Keiyo North	Kamarinyi	Cheboror	Kapkesum	Kapkesum	Sylvia Cherop	Justus	723805913	John		Male	50	Parent	Married	None	Crop farmer	Male headed, male managed	Yes	50	Kalenjin	2	3	3	8	4	Yes	0.25	6.30%	No			Yes	1	25.00%	No			No
173325	11/01/2021 13:12	35.48098167	0.684851667	2304.6	Questionnaire	A small scale farm		Sylvia Cherop	Elgeiyo Marakwet	Keiyo North	Kamarinyi	Cheboror	Kapkesum	kapkesum	Sylvia Cherop	Justus	723805913	Charles		Male	50	Parent	Married	Primary	Crop farmer	Male headed, male managed	Yes	50	Kalenjin	1	1	4	6	6	No			Yes	0.5	8.30%	Yes	1	16.70%	No			No
173326	11/01/2021 12:39	35.47395167	0.683815	2276.4	Questionnaire	The farm is small scale		Sylvia Cherop	Elgeiyo Marakwet	Keiyo North	Kamarinyi	Cheboror	Kapkesum	Kapkesum	Sylvia Cherop	Justus	723805913	Mary Kobilo		Male	65	Grandchild	Married	Primary	Crop farmer	Male headed, male managed	Yes	65	Kalenjin	1	1	3	5	2	Yes	0.25	12.50%	No			Yes	0.5	25.00%	No			No
173327	11/01/2021 12:02	35.471605	0.684498333	2279.5	Questionnaire	The farm is small but has a lot of activities in it like zero grazing unit, poultry keeping and farming		Sylvia Cherop	Elgeiyo Marakwet	Keiyo North	Kamarinyi	Cheboror	Kapkesum	Kapkesum	Sylvia Cherop	Justus	723805913	Philip Kimeli		Male	40	Parent	Married	Secondary	Crop farmer	Male headed, male managed	Yes	40	Kalenjin	2	1	2	5	4	No			Yes	0.5	12.50%	Yes	1	25.00%	No			No
173105	08/01/2021 13:36	35.53205167	0.687505	2059	Questionnaire	small scale farm with mixed farming		Sylvia Cherop	Elgeiyo Marakwet	Keiyo North	Tambach	Kamogich	Anin	Anin	Sylvia Cherop	Justus	723805913	Daisy Jepkorir	702797216	Female	31	Parent	Married	Tertiary	Crop farmer	Male headed, male managed	Yes	31	Kalenjin	1	2	2	5	1				No			Yes	0.25	25.00%	No			No
173111	08/01/2021 13:31	35.53219833	0.687473333	2058.1	Questionnaire	A small scale farm		Sylvia Cherop	Elgeiyo Marakwet	Keiyo North	Tambach	Kamogich	Anin	Anin	Sylvia Cherop	Justus	723805913	Milly kaboi	7214700809	Female	45	Parent	Married	Secondary	Crop farmer	Male headed, male managed	No	20	Kalenjin	1	2	5	8	2	Yes	0.25	12.50%	No			Yes	0.5	25.00%	No			No
173112	08/01/2021 13:23	35.530205	0.689683333	2062	Questionnaire	A small scale farm		Sylvia Cherop	Elgeiyo Marakwet	Keiyo North	Tambach	Kamogich	Anin	Anin	Sylvia Cherop	Justus	723805913	Paul Kimeli	711405693	Male	45	Parent	Married	Tertiary	Salaried/employed	Male headed, male managed	Yes	45	Kalenjin	1	1	3	5	4	No			Yes	1	25.00%	Yes	0.5	12.50%	No			No
173113	08/01/2021 13:18	35.53192167	0.692581667	2078.5	Questionnaire	A small scale farm		Sylvia Cherop	Elgeiyo Marakwet	Keiyo North	Tambach	Kamogich	Anin	Anin	Sylvia Cherop	Justus	723805913			Female	43	Parent	Married	Secondary	Crop farmer	Male headed, male managed	No	15	Kalenjin	1	2	4	7	3	No			Yes	0.5	16.70%	Yes	0.5	16.70%	No			No
173114	08/01/2021 13:11	35.53378333	0.695596667	2099.9	Questionnaire	A small scale farm		Sylvia Cherop	Elgeiyo Marakwet	Keiyo North	Tambach	Kamogich	Anin	Anin	Sylvia Cherop	Justus	723805913			Male	62	Parent	Married	Primary	Crop farmer	Male headed, male managed	Yes	62	Kalenjin	1	1	2	4	3	No			No			Yes	0.25	8.30%	No			No
173115	08/01/2021 13:04	35.533145	0.694728333	2086.8	Questionnaire	It is a small scale farm		Sylvia Cherop	Elgeiyo Marakwet	Keiyo North	Tambach	Kamogich	Anin	Anin	Sylvia Cherop	Justus	723805913	John Komen		Male	50	Parent	Married	Secondary	Crop farmer	Male headed, male managed	Yes	50	Kalenjin	1	3	4	8	2	No			No			No			No			No
173116	08/01/2021 12:57	35.53217667	0.692931667	2081	Questionnaire	It is a small scale farm with horticultural crops		Sylvia Cherop	Elgeiyo Marakwet	Keiyo North	Tambach	Kamogich	Anin	Anin	Sylvia Cherop	Justus	723805913	Morris Kibet		Male	65	Parent	Married	Primary	Crop farmer	Male headed, male managed	Yes	65	Kalenjin	1	1	2	4	1	No			No			Yes	0.25	25.00%	No			No
173117	08/01/2021 12:18	35.53953833	0.707245	2136.8	Questionnaire	A small scale farm		Sylvia Cherop	Elgeiyo Marakwet	Keiyo North	Tambach	Kamogich	Siroch	Siroch	Sylvia Cherop	Justus	723805913	Pascal kibet		Male	72	Parent	Married	Secondary	Retired(pensioner)	Male headed, male managed	Yes	72	Kalenjin	1	3	1	5	3	Yes	0.5	16.70%	No			Yes	0.5	16.70%	No			No
173118	08/01/2021 12:07	35.53847	0.708265	2143.6	Questionnaire	Small scale farm with horticulture		Sylvia Cherop	Elgeiyo Marakwet	Keiyo North	Tambach	Kamogich	Siroch	Siroch	Sylvia Cherop	Justus	723805913	Jane Cherotich		Female	60	Parent	Married	Primary	Crop farmer	Male headed, male managed	Yes	60	Kalenjin	2	1	2	5	2	No			No			No			No			No
173119	08/01/2021 11:58	35.53953167	0.711485	2167.6	Questionnaire	A Small scale farm		Sylvia Cherop	Elgeiyo Marakwet	Keiyo North	Tambach	Kamogich	Siroch	Siroch	Sylvia Cherop	Justus	723805913	Mary Lagat	700590080	Male	57	Parent	Married	Primary	Crop farmer	Male headed, male managed	No	30		1	1	2	4	4	No			No			Yes	1	25.00%	No			No
172842	08/01/2021 10:49	35.52247	0.641768333	2063.7	Questionnaire	A small scale farm		Sylvia Cherop	Elgeiyo Marakwet	Keiyo North	Tambach	Kamogich	Kessup	Kessup	Sylvia Cherop	Justus	723805913	Chebii kilimo		Male	60	Parent	Married	Primary	Crop farmer	Male headed, male managed	Yes	60	Kalenjin	1	3	3	7	2	No			No			Yes	0.5	25.00%	No
173059	08/01/2021 10:43	35.52187	0.641271667	2069.9	Questionnaire	A small scale farm		Sylvia Cherop	Elgeiyo Marakwet	Keiyo North	Tambach	Kamogich	Kessup	Kessup	Sylvia Cherop	Justus	723805913	Mike Kemboi	721000560	Male	38	Parent	Married	Secondary	Crop farmer	Male headed, male managed	Yes	38	Kalenjin	1	2	3	6	2	No			No			Yes	0.5	25.00%	No
172845	08/01/2021 10:41	35.520925	0.64066	2076.8	Questionnaire	A small scale farm		Sylvia Cherop	Elgeiyo Marakwet	Keiyo North	Tambach	Kamogich	Kessup	Kessup	Sylvia Cherop	Justus	723805913	Alice kemei	721761903	Female	40	Spouse	Married	Secondary	Business	Male headed, male managed	Yes	40	Kalenjin	1	1	4	6	1	No			Yes	0.25	25.00%	Yes	0.25	25.00%	No			No
172844	08/01/2021 10:34	35.52064667	0.640563333	2078.8	Questionnaire	Basically a small farm		Sylvia Cherop	Elgeiyo Marakwet	Keiyo North	Tambach	Kamogich	Kessup	Kessup	Sylvia Cherop	Justus	723805913	Jennifer Suma		Female	50	Parent	Married	Primary	Crop farmer	Male headed, male managed	Yes	50	Kalenjin	1	1	2	4	3	No			Yes	0.25	8.30%	Yes	0.5	16.70%	No			No
172843	08/01/2021 10:18	35.52119167	0.640718333	2073.6	Questionnaire	A small scale		Sylvia Cherop	Elgeiyo Marakwet	Keiyo North	Tambach	Kamogich	Kessup	Kessup	Sylvia Cherop	Justus	723805913	Magie Chebet	700590025	Female	69	Parent	Widowed	Primary	Crop farmer	Female headed, female managed	Yes	69	Kalenjin	0	1	4	5	1	No			Yes	0.25	25.00%	Yes	0.5	50.00%	No
172841	08/01/2021 10:10	35.522125	0.641151667	2063	Questionnaire	A small scale farm		Sylvia Cherop	Elgeiyo Marakwet	Keiyo North	Tambach	Kamogich	Kessup	Kessup	Sylvia Cherop	Justus	723805913	Mike Suter		Male	56	Parent	Married	Primary	Crop farmer	Male headed, male managed	Yes	56	Kalenjin	1	1	3	5	3	No			No			Yes	1	33.30%	No			No
172820	08/01/2021 9:43	35.52357667	0.643781667	2026.3	Questionnaire	a small farm		Sylvia Cherop	Elgeiyo Marakwet	Keiyo North	Tambach	Kamogich	Kessup	Kessup	Sylvia Cherop	Justus	723805913			Male	40	Parent	Married	Primary	Crop farmer	Male headed, male managed	Yes	40	Kalenjin	1	1	5	7	0.5	No			No			Yes	0.5	100.00%	No			No
172819	08/01/2021 9:23	35.52306	0.642341667	2048.5	Questionnaire	It is a small scale farm with animal keeping		Sylvia Cherop	Elgeiyo Marakwet	Keiyo North	Tambach	Kamogich	Kessup	kessup	Sylvia Cherop	Justus	723805913	Viola cheboi	7137569611	Female	27	Spouse	Married	Secondary	Crop farmer	Male headed, male managed	Yes	27	Kalenjin	1	1	3	5	0.25	No			No			Yes	0.25	100.00%	No			No
172817	07/01/2021 14:26	35.52325833	0.615355	1982.8	Questionnaire	Small scale		Sylvia Cherop	Elgeiyo Marakwet	Keiyo North	Tambach	Kiptulong	Setek	Setek	Sylvia Cherop	Justus	723805913	Rebbeca Jeptanui	795641558	Female	29	Parent	Married	Secondary	Business	Male headed, male managed	Yes	29	Kalenjin	1	1	2	4	1.5	No			No			Yes	0.25	16.70%	No			No
172816	07/01/2021 14:15	35.52732	0.610615	1961.5	Questionnaire	a small scale		Sylvia Cherop	Elgeiyo Marakwet	Keiyo North	Tambach	Kiptulong	Kiptulong	Setek	Sylvia Cherop	Justus	723805913	Susan kiptoo		Female	59	Spouse	Married	Primary	Crop farmer	Male headed, male managed	Yes	59	Kalenjin	1	1	5	7	3	No			No			Yes	1	33.30%	No			No
172815	07/01/2021 13:50	35.52611167	0.60791	1949.5	Questionnaire	The land is small but the farmer practice mixed farming		Sylvia Cherop	Elgeiyo Marakwet	Keiyo North	Tambach	Kiptulong	Setek	Chepkogin	Sylvia Cherop	Justus	723805913	Dina Waweru	706228120	Female	60	Parent	Married	Secondary	Crop farmer	Male headed, male managed	Yes	60	Kalenjin	1	1	4	6	6	No			No			No			No			No
172814	07/01/2021 13:32	35.521845	0.600903333	1999.7	Questionnaire	It is a small scale		Sylvia Cherop	Elgeiyo Marakwet	Keiyo North	Tambach	Kiptulong	Kapterik	Kapterik	Sylvia Cherop	Justus	723805913	Nancy Kemboi	702590741	Female	27	Child	Single	Tertiary	None	Male headed, male managed	Yes	27	Kalenjin	1	1	3	5	1.5	No			No			Yes	0.25	16.70%	No			No
172813	07/01/2021 13:07	35.521225	0.59975	2003.7	Questionnaire	It is a small scale farm		Sylvia Cherop	Elgeiyo Marakwet	Keiyo North	Tambach	Kiptulong	Kapterik	Kapterik	Sylvia Cherop	Justus	723805913	Christine Kibet	711575280	Female	59	Parent	Married	Primary	Crop farmer	Male headed, male managed	No	20	Kalenjin	1	1	3	5	4	Yes	0.25	6.30%	No			Yes	0.5	12.50%	No
172811	07/01/2021 12:49	35.52298667	0.598366667	1999.2	Questionnaire	A small scale farm		Sylvia Cherop	Elgeiyo Marakwet	Keiyo North	Tambach	Kiptulong	Kapterik	Kapterik	Sylvia Cherop	Justus	723805913	Lydia chebet	758965599	Female	29	Parent	Married	Secondary	None	Male headed, male managed	Yes	29	Kalenjin	1	2	2	5	4	No			No			Yes	0.5	12.50%	No			No
172812	07/01/2021 12:42	35.52298333	0.59837	2001.9	Questionnaire	A small scale		Sylvia Cherop	Elgeiyo Marakwet	Keiyo North	Tambach	Kiptulong	Kapterik	Kapterik	Sylvia Cherop	Justus	723805913	Ashley Cherono	724065560	Female	35	Spouse	Married	Secondary	Crop farmer	Male headed, male managed	Yes	35	Kalenjin	1	1	2	4	3	No			No			Yes	0.5	16.70%	No			No
172810	07/01/2021 12:33	35.52246333	0.597661667	1983.8	Questionnaire	it is a small scale farm		Sylvia Cherop	Elgeiyo Marakwet	Keiyo North	Tambach	Kiptulong	Kapterik	Kapterik	Sylvia Cherop	Justus	723805913	Alice Cherono	702449875	Female	27	Parent	Married	Tertiary	Salaried/employed	Male headed, male managed	No	3	Kalenjin	1	2	1	4	0.75	No						No			No			No
172809	07/01/2021 12:22	35.52253833	0.597456667	1988.7	Questionnaire	It is a small scale farm		Sylvia Cherop	Elgeiyo Marakwet	Keiyo North	Tambach	Kiptulong	Kapterik	Kapterik	Sylvia Cherop	Justus	723805913	Evaline maingi	700828030	Female	36	Parent	Married	Tertiary	Salaried/employed	Male headed, male managed	No	14	Kamba	1	1	1	3	1.5	No			No			No			No			No
172808	07/01/2021 11:24	35.51528667	0.567945	2165.8	Questionnaire	The land is small scale		Sylvia Cherop	Elgeiyo Marakwet	Keiyo North	Tambach	Kiptulong	Kipka	Kipka	Sylvia Cherop	Justus	723805913	Mercy Jelagat		Female	25	Parent	Single	Primary	Crop farmer	Female headed, female managed	Yes	25	Kalenjin	1	1	1	3	0.5	No			No			Yes	0.5	100.00%	No			No
172807	07/01/2021 11:05	35.51459	0.563851667	2157.5	Questionnaire	small scale rearing livestock		Sylvia Cherop	Elgeiyo Marakwet	Keiyo North	Tambach	Kiptulong	Kipka	Kipka	Sylvia Cherop	Justus	723805913	Sharon koech	718951115	Female	39	Parent	Married	Tertiary	Salaried/employed	Male headed, male managed	Yes	39	Kalenjin	1	1	3	5	0.5	No			No			Yes	0.5	100.00%	No			No
172806	07/01/2021 10:55	35.51383	0.565258333	2170.1	Questionnaire	it is a small scale dealing with agroforestry		Sylvia Cherop	Elgeiyo Marakwet	Keiyo North	Tambach	Kiptulong	Kipka	Kipka	Sylvia Cherop	Justus	723805913	Rael kangogo	703664484	Female	49	Parent	Married	Primary	Crop farmer	Male headed, male managed	Yes	49	Kalenjin	1	1	3	5	1.5	No			No			Yes	1	66.70%	No			No
172805	07/01/2021 10:49	35.514255	0.56513	2172.6	Questionnaire	small scale		Sylvia Cherop	Elgeiyo Marakwet	Keiyo North	Tambach	Kiptulong	Kipka	Kipka	Sylvia Cherop	Justus	723805913	Selina kabon		Female	79	Parent	Married	Primary	Crop farmer	Male headed, male managed	Yes	79	Kalenjin	1	1	1	3	0.5	No			No			Yes	0.5	100.00%	No			No
172804	07/01/2021 10:40	35.51423333	0.565121667	2171.6	Questionnaire	small scale		Sylvia Cherop	Elgeiyo Marakwet	Keiyo North	Tambach	Kiptulong	Kipka	Kipka	Sylvia Cherop	Justus	723805913	Celestine Jepchumba	791159405	Female	35	Child	Single	Primary	Crop farmer	Female headed, female managed	Yes	35	Kalenjin	0	1	1	2	0.5	No			No			Yes	0.5	100.00%	No			No
172801	07/01/2021 10:31	35.51436833	0.564695	2161.6	Questionnaire	small scale having mix farming		Sylvia Cherop	Elgeiyo Marakwet	Keiyo North	Tambach	Kiptulong	Kipka	Kipka	Sylvia Cherop	Justus	723805913	Faith Maiyo	727082638	Female	31	Parent	Married	Primary	Crop farmer	Male headed, male managed	Yes	31	Kalenjin	1	1	2	4	0.5	No			No			Yes	0.25	50.00%	No			No
172802	07/01/2021 10:16	35.514505	0.564258333	2153	Questionnaire	Small scale farmer		Sylvia Cherop	Elgeiyo Marakwet	Keiyo North	Tambach	Kiptulong	Kiptulong	Kipka	Sylvia Cherop	Justus	723805913	Alfayo Maiyo	724649352	Male	30	Parent	Married	Tertiary	Pastoralists	Male headed, male managed	Yes	30	Kalenjin	1	1	2	4	1	No			No			Yes	0.5	50.00%	No
172803	07/01/2021 10:05	35.515785	0.565075	2152.4	Questionnaire	it is a small scale dealing with agroforestry		Sylvia Cherop	Elgeiyo Marakwet	Keiyo North	Tambach	Kiptulong	Kipka	Kipka	Sylvia Cherop	Justus	723805913	Eunice kiplagat		Female	52	Spouse	Married	Primary	Crop farmer	Male headed, male managed	Yes	52	Kalenjin	1	1	3	5	1	No			No			Yes	0.5	50.00%	No			No
171868	05/01/2021 15:02	35.445865	0.460213333	2344.6	Questionnaire	farmer		Oliver	Uasingishu	Ainabkoi	Kaptagat	Kipsinende	Kongasis	Strawback	Oliver Lelan	justus		kigen		Male	54	HH(Self)	Married	Tertiary	Crop farmer	Male headed, male managed	Yes	54	Kalenjin	2	3	3	5	6	No			Yes	1	16.70%	Yes	3	50.00%	No			No
171869	05/01/2021 14:54	35.44779667	0.458413333	2337.1	Questionnaire	farmer		Oliver	Uasingishu	Ainabkoi	Kaptagat	Kipsinende	Kongasis	Kongasis	Oliver Lelan	justus		arap tugen		Male	47	HH(Self)	Married	Secondary	Crop farmer	Male headed, male managed	Yes	47	Kalenjin	2	4	3	6	24	No			Yes	4	16.70%	Yes	10	41.70%	No			No
172481	05/01/2021 14:39	35.41937667	0.466145	2309.6	Questionnaire	fatmer		Oliver	Uasingishu	Ainabkoi	Kaptagat	Kaptagat	Lotonyok	Chamyet	Oliver Lelan	justus		reuben		Male	47	HH(Self)	Married	Secondary	Crop farmer	Male headed, male managed	No	10	Kalenjin	2	1	0	3	1.25	No			No			No			No			No
172482	05/01/2021 14:35	35.42363167	0.474478333	2309.1	Questionnaire	farmer		Oliver	Uasingishu	Ainabkoi	Kaptagat	Kaptagat	Lotonyok	Uhuru	Oliver Lelan	justus		boinnet		Female		HH(Self)	Widowed	Tertiary	Crop farmer	Female headed, female managed	Yes		Kalenjin	1	2	0	3	16	No			Yes	2	12.50%	Yes	6	37.50%	No			No
172483	05/01/2021 14:34	35.42191167	0.478546667	2310.7	Questionnaire	farmer		Oliver	Uasingishu	Ainabkoi	Kaptagat	Kaptagat	Lotonyok	Kapngetuny	Oliver Lelan	justus		Moses		Male	39	HH(Self)	Married	Secondary	Crop farmer	Male headed, male managed	Yes	39	Kalenjin	3	4	5	7	4	No			No			Yes	2	50.00%	No			No
172484	05/01/2021 14:30	35.42026167	0.484708333	2297.5	Questionnaire	farmer		Oliver	Uasingishu	Ainabkoi	Kaptagat	Kaptagat	Lotonyok	Uhuru	Oliver Lelan	justus		madam sarah		Female	64	HH(Self)	Widowed	Tertiary	Crop farmer	Female headed, female managed	Yes	64	Kalenjin	2	1	0	3	60	No			Yes	10	16.70%	Yes	15	25.00%	No			No
172478	05/01/2021 14:27	35.42053167	0.482796667	2295.2	Questionnaire	farmer		Oliver	Uasingishu	Ainabkoi	Kaptagat	Kaptagat	Lotonyok	Uhuru	Oliver Lelan	justus		ngeno		Male	54	HH(Self)	Married	Secondary	Crop farmer	Male headed, male managed	Yes	54	Kalenjin	3	2	0	5	12	No			Yes	2	16.70%	Yes	4	33.30%	No			No
172479	05/01/2021 14:22	35.42156	0.479348333	2303.9	Questionnaire	farmer		Oliver	Uasingishu	Ainabkoi	Kaptagat	Kaptagat	Lotonyok	Uhuru	Oliver Lelan	justus		arap rop		Male	55	HH(Self)	Married	Secondary	Crop farmer	Male headed, male managed	Yes	55	Kalenjin	3	4	0	7	12	No			Yes	2	16.70%	Yes	4	33.30%	No			No
172480	05/01/2021 14:18	35.423305	0.47605	2303.6	Questionnaire	farmer		Oliver	Uasingishu	Ainabkoi	Kaptagat	Kaptagat	Lotonyok	Kapngetuny	Oliver Lelan	justus		benjamen		Male	62	HH(Self)	Married	Secondary	Crop farmer	Male headed, male managed	Yes	62	Kalenjin	4	3	0	7	50	No			Yes	10	20.00%	Yes	20	40.00%	No			No
172283	05/01/2021 14:13	35.42225	0.472021667	2305.3	Questionnaire	farmer		Oliver	Uasingishu	Ainabkoi	Kaptagat	Kaptagat	Lotonyok	Kapngetuny	Oliver Lelan	justus		malus mboya		Male	52	HH(Self)	Married	Secondary	Crop farmer	Male headed, male managed	Yes	52	Kalenjin	3	3	0	6	10	No			Yes	1	10.00%	Yes	4	40.00%	No			No
172284	05/01/2021 14:08	35.41895167	0.465036667	2295.8	Questionnaire	working		Oliver	Uasingishu	Ainabkoi	Kaptagat	Kaptagat	Lotonyok	Kapsirwo	Oliver Lelan	justus		mboya justine		Male	53	HH(Self)	Married	Tertiary	Salaried/employed	Male headed, male managed	Yes	53	Kalenjin	4	3	0	7	15	No			Yes	2	13.30%	Yes	5	33.30%	No			No
172285	05/01/2021 14:03	35.42415167	0.462486667	2321.4	Questionnaire	farmer		Oliver	Uasingishu	Ainabkoi	Kaptagat	Kaptagat	Lotonyok	Kapsirwo	Oliver Lelan	justus		cherono		Male	47	HH(Self)	Married	Tertiary	Crop farmer	Male headed, male managed	Yes	47	Kalenjin	2	2	2	4	20	No			Yes	5	25.00%	Yes	3	15.00%	No			No
171870	05/01/2021 13:58	35.42842667	0.460903333	2341	Questionnaire	farmer		Oliver	Uasingishu	Ainabkoi	Kaptagat	Kaptagat	Lotonyok	Haraka Deiri	Oliver Lelan	justus		kiprono		Male	36	HH(Self)	Married	Tertiary	Crop farmer	Male headed, male managed	Yes	36	Kalenjin	1	1	0	2	4	No			Yes	0.5	12.50%	Yes	1	25.00%	No			No
171871	05/01/2021 13:57	35.43561333	0.466926667	2339	Questionnaire	farmer		Oliver	Uasingishu	Ainabkoi	Kaptagat	Kaptagat	Lotonyok	Haraka Deiri	Oliver Lelan	justus		willie		Male	52	HH(Self)	Married	Secondary	Crop farmer	Male headed, male managed	Yes	52	Kalenjin	1	2	0	3	12	No			Yes	3	25.00%	Yes	4	33.30%	No			No
171872	05/01/2021 13:53	35.43941833	0.475303333	2312.4	Questionnaire	farmer		Oliver	Uasingishu	Ainabkoi	Kaptagat	Kaptagat	Lotonyok	Uhuru	Oliver Lelan	justis		daniel		Male	58	HH(Self)	Married	Secondary	Crop farmer	Male headed, male managed	Yes	58	Kalenjin	5	4	5	9	30	No			Yes	4	13.30%	Yes	2	6.70%	No			No
171556	03/01/2021 11:50	35.55378333	0.24928	2499.1	Questionnaire	farming		Emmanuel Barmao	Elgeiyo Marakwet	Keiyo South	Metkei	Kamwosor	Kapchorwa	Kapchebutuk	Barmao Emmanuel	Justus eragae	723805913	Esther kiptoo	722909298	Female	55	HH(Self)	Widowed	Secondary	Business	Female headed, female managed	Yes	55	Kalenjin	1	4	1	7	14	No			Yes	5	35.70%	Yes	1	7.10%	No			Yes	0.5	3.60%
171557	03/01/2021 11:34	35.56099667	0.227885	2554.1	Questionnaire	farming		Emmanuel Barmao	Elgeiyo Marakwet	Keiyo South	Metkei	Kamwosor	Kamwosor	Kiptenden	Barmao Emmanuel	Justus	723805913	Jane barmao	725701901	Female	48	HH(Self)	Single	Primary	Crop farmer	Female headed, female managed	Yes	48	Kalenjin	1	2	3	7	4	No			No			Yes	1	25.00%	No			Yes	0.5	12.50%
171558	03/01/2021 11:13	35.560895	0.227945	2542.5	Questionnaire	farming		Emmanuel Barmao	Elgeiyo Marakwet	Keiyo South	Metkei	Kamwosor	Kamwosor	Kapsowek	Barmao Emmanuel	Justus eragae	723805913	Peter kipsos	714190685	Male	43	HH(Self)	Married	Secondary	Business	Male headed, male managed	Yes	43	Kalenjin	2	1	3	8	11	No						Yes	2	18.20%	No			Yes	0.5	4.50%
171559	03/01/2021 11:00	35.56416167	0.21791	2571.2	Questionnaire	farming		Emmanuel Barmao	Elgeiyo Marakwet	Keiyo South	Metkei	Kamwosor	Kamwosor	Kapsowek	Barmao Emmanuel	Justus eragae	723805913		724123670	Female	40	Spouse	Married	Tertiary	Business	Male headed, male managed	Yes	40	Kalenjin	0	0	4	6	8	No			Yes	2	25.00%	Yes	1	12.50%	No			Yes	0.5	6.30%
171560	03/01/2021 9:15	35.569085	0.201866667	2598	Questionnaire	farming		Emmanuel Barmao	Elgeiyo Marakwet	Keiyo South	Metkei	Kamwosor	Kamwosor	Kamwosor	Barmao Emmanuel	Justus eragae	723805913	kemei	714841740	Male		HH(Self)	Married	Tertiary	Business	Male headed, male managed	Yes		Kalenjin	2	3	1	7	5	Yes	0.25	5.00%	Yes	1	20.00%	Yes	1	20.00%	No			Yes	0.5	10.00%
171561	03/01/2021 8:52	35.54910167	0.244123333	2513.4	Questionnaire	farming		Emmanuel Barmao	Elgeiyo Marakwet	Keiyo South	Metkei	Kapkwoni	Cheboge	Kapkon'ga	Barmao Emmanuel	Justus eragae	723805913		725104753	Male	33	Child	Married	Undergraduate	Business	Male headed, male managed	Yes	33	Kalenjin	2	4	0	8	7	No			No			Yes	0.5	7.10%	No			Yes	0.5	7.10%
171562	03/01/2021 8:27	35.549395	0.2441	2502.8	Questionnaire	farming		Emmanuel Barmao	Elgeiyo Marakwet	Keiyo South	Metkei	Kapkwoni	Cheboge	Kapkon'ga	Barmao Emmanuel	Justus eragae	723805913		729245920	Male	30	Child	Married	Tertiary	Business	Male headed, male managed	Yes	30	Kalenjin	2	2	3	9	10	No			Yes	1	10.00%	Yes	7	70.00%	No			Yes	0.5	5.00%
171563	03/01/2021 8:09	35.54911667	0.244165	2512.5	Questionnaire	farming		Emmanuel Barmao	Elgeiyo Marakwet	Keiyo South	Metkei	Kapkwoni	Cheboge	Cheboge	Barmao Emmanuel	Justus eragae	723805913	danson	724089052	Male	37	HH(Self)	Married	Tertiary	Crop farmer	Male headed, male managed	Yes	37	Kalenjin	0	0	3	6	7	No			Yes	0.25	3.60%	Yes	2	28.60%	No			Yes	1	14.30%
171867	01/01/2021 17:50	35.493745	0.636603333	2339.8	Questionnaire	farming		Karen	Elgeiyo Marakwet	Keiyo North	Kamarinyi	Mutei	Kipsoen	Kessup	Caren	Justus		Michael talam		Male	54	Parent	Married	Secondary	Crop farmer	Male headed, female managed	Yes	54	Kalenjin	3	3	3	8	12	No			Yes	1	8.30%	Yes	2	16.70%	No			Yes	0.5	4.20%
171866	01/01/2021 17:48	35.49319333	0.631073333	2346	Questionnaire	farming		Karen	Elgeiyo Marakwet	Keiyo North	Kamarinyi	Mutei	Kipsoen	Kipsoen	Caren	Justus		Emily jepkorir		Female	45	Parent	Married	Secondary	Crop farmer	Male headed, female managed	No	13	Kalenjin	3	2	3	7	10	No			Yes	1	10.00%	Yes	1	10.00%	No			Yes	0.33	3.30%
171865	01/01/2021 17:42	35.49311833	0.625976667	2335	Questionnaire	farming		Karen	Elgeiyo Marakwet	Keiyo North	Kamarinyi	Mutei	Kipsoen	Kessup	Caren	Justus		Leah jebet		Female	29	Parent	Married	Tertiary	Crop farmer	Male headed, female managed	No	3	Kalenjin	1	0	1	3	5	No			Yes	0.5	10.00%	Yes	1	20.00%	No			Yes	0.33	6.60%
171864	01/01/2021 17:21	35.49618833	0.622496667	2311.1	Questionnaire	farming		Karen	Elgeiyo Marakwet	Keiyo North	Kamarinyi	Mutei	Kipsoen	Kessup	Caren	Justus		Gilbert kiptoo		Male	56	Parent	Married	Secondary	Crop farmer	Male headed, female managed	Yes	56	Kalenjin	2	1	2	5	7	No			Yes	0.5	7.10%	Yes	1	14.30%	No			Yes	0.33	4.70%
171863	01/01/2021 17:12	35.49623833	0.620603333	2307.1	Questionnaire	farming		Karen	Elgeiyo Marakwet	Keiyo North	Kamarinyi	Mutei	Kipsoen	Kipsoen	Caren	Justus		David maiyo		Male	60	Parent	Married	Secondary	Crop farmer	Male headed, female managed	Yes	60	Kalenjin	2	2	3	6	11	No			Yes	1	9.10%	Yes	1	9.10%	No			Yes	0.33	3.00%
171862	01/01/2021 17:06	35.49431167	0.617916667	2340.3	Questionnaire	farming		Karen	Elgeiyo Marakwet	Keiyo North	Kamarinyi	Mutei	Kipsoen	Kipsoen	Caren	Justus		Robinson yator		Male	60	Parent	Married	Secondary	Crop farmer	Male headed, female managed	Yes	60	Kalenjin	2	2	3	6	19	No			Yes	0.5	2.60%	Yes	1	5.30%	No			Yes	0.33	1.70%
171715	01/01/2021 16:57	35.49327833	0.615941667	2345.9	Questionnaire	farming		Karen	Elgeiyo Marakwet	Keiyo North	Kamarinyi	Mutei	Kipsoen	Kaptili	Caren	justus		Ann chemjori	716379612	Female	58	Parent	Married	Secondary	Crop farmer	Male headed, female managed	Yes	58	Kalenjin	7	1	3	19	8	No			Yes	1	12.50%	Yes	1	12.50%	No			Yes	0.33	4.10%
171713	01/01/2021 16:48	35.491575	0.615593333	2343.8	Questionnaire	farming		Karen	Elgeiyo Marakwet	Keiyo North	Kamarinyi	Mutei	Kipsoen	Kipsoen	Caren	Justus		rosemary keitany		Female	37	Parent	Married	Tertiary	Crop farmer	Male headed, female managed	No	10	Kalenjin	2	1	3	6	12	No			Yes	0.5	4.20%	Yes	2	16.70%	No			Yes	0.33	2.80%
171714	01/01/2021 16:09	35.48441333	0.600193333	2368.7	Questionnaire	farming		Karen	Elgeiyo Marakwet	Keiyo North	Kamarinyi	Mutei	Chelingwa	Kapsisi	Caren	Justus		Sarah sawe		Female	53	Parent	Married	Secondary	Crop farmer	Male headed, female managed	No	20	Kalenjin	4	3	1	8	12	No			Yes	1	8.30%	Yes	2	16.70%	No			Yes	0.5	4.20%
171716	01/01/2021 15:13	35.48407667	0.597281667	2372.7	Questionnaire	farming		Karen	Elgeiyo Marakwet	Keiyo North	Kamarinyi	Mutei	Chelingwa	Kaproron	Caren	justus		Jackson rotich		Male	55	Parent	Married	Secondary	Crop farmer	Male headed, female managed	Yes	55	Kalenjin	2	1	1	5	7	No			Yes	0.5	7.10%	Yes	1	14.30%	No			Yes	0.25	3.60%
171298	01/01/2021 14:44	35.48398167	0.594403333	2385.6	Questionnaire	farming		Karen	Elgeiyo Marakwet	Keiyo North	Kamarinyi	Mutei	Chelingwa	Chelingwa	Caren	Justus		Mary kipkorir		Female	56	Parent	Married	Secondary	Crop farmer	Male headed, female managed	No	15	Kalenjin	5	2	5	7	12	No			Yes	0.5	4.20%	Yes	9.5	79.20%	No			Yes	0.33	2.80%
171299	01/01/2021 14:32	35.48275	0.592716667	2400.8	Questionnaire	farming		Karen	Elgeiyo Marakwet	Keiyo North	Kamarinyi	Mutei	Chelingwa	Kapsisi	Caren	Justus		samwel bore		Male	66	Parent	Married	Tertiary	Crop farmer	Male headed, female managed	Yes	66	Kalenjin	4	2	4	8	12	No			Yes	1	8.30%	Yes	1	8.30%	No			No
171300	01/01/2021 14:19	35.48607167	0.592045	2398.4	Questionnaire	farming		Karen	Elgeiyo Marakwet	Keiyo North	Kamarinyi	Mutei	Chelingwa	Kaproron	Caren	Justus		viola koech		Female	46	Parent	Married	Secondary	Crop farmer	Male headed, female managed	No	3	Kalenjin	2	1	2	5	12	No			Yes	0.5	4.20%	Yes	1	8.30%	No			Yes	0.33	2.80%
171301	01/01/2021 13:22	35.486225	0.587156667	2394	Questionnaire	farming		Karen	Elgeiyo Marakwet	Keiyo North	Kamarinyi	Mutei	Chelingwa	Chelingwa	Caren	Justus		Philip torotich		Male	70	Parent	Married	Tertiary	Crop farmer	Male headed, female managed	Yes	70	Kalenjin	4	2	3	8	12	No			Yes	0.5	4.20%	Yes	9.5	79.20%	No			Yes	0.25	2.10%
171302	01/01/2021 13:02	35.48319833	0.587843333	2396.5	Questionnaire	farming		Karen	Elgeiyo Marakwet	Keiyo North	Kamarinyi	Mutei	Chelingwa	Chelingwa	Caren	Justus		David kurui		Male	67	Parent	Married	Secondary	Crop farmer	Male headed, female managed	Yes	67	Kalenjin	3	1	1	6	8	No			Yes	0.5	6.30%	Yes	7.5	93.80%	No			Yes
171292	01/01/2021 12:28	35.53929667	0.245551667	2563.6	Questionnaire	farming		Emmanuel Barmao	Elgeiyo Marakwet	Keiyo South	Kabiemit	Tumeiyo	Chepkurmum	Kapkalan	Barmao Emmanuel	Justus eragae	723805913	kemei	720148818	Male	47	HH(Self)	Married	Primary	Crop farmer	Male headed, male managed	Yes	47	Kalenjin	5	0	3	10	5	Yes	0.5	10.00%	Yes	0.5	10.00%	Yes	1	20.00%	No			Yes	0.25	5.00%
171294	01/01/2021 12:17	35.522615	0.240821667	2545.9	Questionnaire	farming		Emmanuel Barmao	Elgeiyo Marakwet	Keiyo South	Kabiemit	Tumeiyo	Chepkurmum	KD	Barmao Emmanuel	Justus eragae	723805913		729016111	Male	42	HH(Self)	Married	Secondary	Salaried/employed	Male headed, male managed	Yes	42	Kalenjin	2	1	2	7	4	No			Yes	0.5	12.50%	Yes	1	25.00%	No			Yes	0.5	12.50%
171295	01/01/2021 12:09	35.52031333	0.243123333	2566.8	Questionnaire	farming		Emmanuel Barmao	Elgeiyo Marakwet	Keiyo South	Kabiemit	Tumeiyo	Chepkurmum	Timor	Barmao Emmanuel	Justus eragae	723805913	Micah	728051931	Male	32	Child	Single	Secondary	Crop farmer	Male headed, male managed	Yes	32	Kalenjin	3	2	2	9	14	No			Yes	2	14.30%	Yes	2	14.30%	No			Yes	0.5	3.60%
171296	01/01/2021 11:58	35.52037833	0.24308	2564.2	Questionnaire	farming		Emmanuel Barmao	Elgeiyo Marakwet	Keiyo South	Kabiemit	Tumeiyo	Chepkosom	Siliboi	Barmao Emmanuel	Justus eragae	723805913	Sarah	726445475	Female	58	HH(Self)	Single	Primary	Crop farmer	Female headed, female managed	Yes	58	Kalenjin	1	6	0	8	6	No			Yes	0.5	8.30%	Yes	1	16.70%	No			Yes	0.25	4.20%
171297	01/01/2021 11:34	35.52136667	0.245075	2574.9	Questionnaire	farming		Emmanuel Barmao	Elgeiyo Marakwet	Keiyo South	Kabiemit	Tumeiyo	Chepkosom	Metipso	Barmao Emmanuel	Justus eragae	723805913	kimtai	729876216	Male		Child	Single	Tertiary	Business	Female headed, female managed	Yes		Kalenjin	2	1	1	8	1	No			Yes	0.5	50.00%	Yes	0.5	50.00%	No			Yes	0.13	12.50%
171303	01/01/2021 11:15	35.48418	0.577761667	2355	Questionnaire	farming		Karen	Elgeiyo Marakwet	Keiyo North	Kamarinyi	Mutei	Kapteren	Kapkormo	Caren	Justus		Pamela chepmorina		Female	55	Parent	Married	Secondary	Crop farmer	Male headed, female managed	Yes	55	Kalenjin	4	4	6	10	5	No			Yes	1	20.00%	Yes	4	80.00%	No			Yes
171304	01/01/2021 10:53	35.48673833	0.574295	2359.6	Questionnaire	farming		Karen	Elgeiyo Marakwet	Keiyo North	Kamarinyi	Mutei	Kapteren	Kapkormo	Caren	justus		Sammy kibet		Male	45	Parent	Married	Secondary	Crop farmer	Male headed, female managed	Yes	45	Kalenjin	2	2	4	6	10	No			Yes	2	20.00%	Yes	6	60.00%	No			Yes
171305	01/01/2021 10:34	35.48298333	0.574101667	2368.1	Questionnaire	farming		Karen	Elgeiyo Marakwet	Keiyo North	Kamarinyi	Mutei	Kapteren	Kapkormo	Caren	Justus		Paul cherop		Male	65	Parent	Married	Secondary	Crop farmer	Male headed, female managed	Yes	65	Kalenjin	4	2	0	8	14	No			Yes	1	7.10%	Yes	11	78.60%	No			Yes	0.33	2.40%
171306	01/01/2021 9:48	35.483825	0.560608333	2369	Questionnaire	farming		Karen	Elgeiyo Marakwet	Keiyo North	Kamarinyi	Mutei	Kapteren	Simotwo	Caren	justus		Michael chepkonga	724518524	Male	27	Parent	Married	Secondary	Crop farmer	Male headed, female managed	No	6	Kalenjin	1	2	3	5	13	No			Yes	0.5	3.80%	Yes	11.5	88.50%	No			Yes
171307	01/01/2021 9:32	35.48478833	0.561491667	2375.1	Questionnaire	farming		Karen	Elgeiyo Marakwet	Keiyo North	Kamarinyi	Mutei	Kapteren	Simotwo	Caren	Justus		Noah kiplagat	716706149	Male	55	Parent	Married	Secondary	Crop farmer	Male headed, female managed	Yes	55	Kalenjin	4	1	3	7	5	No			Yes	0.5	10.00%	Yes	2.5	50.00%	No			Yes
171308	01/01/2021 9:17	35.481215	0.561721667	2379.8	Questionnaire	farming		Karen	Elgeiyo Marakwet	Keiyo North	Kamarinyi	Mutei	Kapteren	Kapteren	Caren	Justus		Gladys kemboi		Female	46	Parent	Married	Secondary	Crop farmer	Male headed, female managed	No	10	Kalenjin	2	2	4	6	6	No			Yes	0.25	4.20%	Yes	1	16.70%	No			Yes	0.33	5.60%
171309	01/01/2021 9:07	35.47944333	0.560961667	2354.9	Questionnaire	farming		Karen	Elgeiyo Marakwet	Keiyo North	Kamarinyi	Mutei	Kapteren	Kapteren	Caren	Justus		James kiteri		Male	56	Parent	Married	Secondary	Crop farmer	Male headed, female managed	Yes	56	Kalenjin	3	2	4	7	8	No			Yes	0.5	6.30%	Yes	2	25.00%	No			Yes	0.33	4.20%
170703	31/12/2020 16:35	35.56942667	0.198265	2603.6	Questionnaire	farming		Emmanuel Barmao	Elgeiyo Marakwet	Keiyo South	Soy South	Kocholwo	Kocholwo	Teber	Barmao Emmanuel	Justus eragae	723805913	victor	7209776491	Male	30	HH(Self)	Married	Secondary	Crop farmer	Male headed, male managed	Yes	30	Kalenjin	0	0	3	5	6	No			Yes	0.5	8.30%	Yes	5.5	91.70%	No			Yes	0.13	2.10%
170704	31/12/2020 16:28	35.63801167	0.21675	2019.4	Questionnaire	farming		Emmanuel Barmao	Elgeiyo Marakwet	Keiyo South	Soy South	Kocholwo	Kocholwo	Teber	Barmao Emmanuel	Justus eragae	723805913	peter	721425928	Male		HH(Self)	Married	Undergraduate	Business	Male headed, male managed	Yes		Kalenjin	0	0	3	5	12	No			Yes	2	16.70%	Yes	3	25.00%	No			Yes	1	8.30%
170705	31/12/2020 16:09	35.63807167	0.216675	2016.8	Questionnaire	farming		Emmanuel Barmao	Elgeiyo Marakwet	Keiyo South	Soy South	Kocholwo	Kocholwo	Teber	Barmao Emmanuel	Justus eragae	723805913	sila	726163879	Male	32	HH(Self)	Married	Tertiary	Crop farmer	Male headed, male managed	Yes	32	Kalenjin	0	0	4	6	8	No			Yes	2.5	31.30%	Yes	5.5	68.80%	No			Yes	0.25	3.10%
170706	31/12/2020 15:48	35.62315833	0.217386667	2116.6	Questionnaire	farming		Emmanuel Barmao	Elgeiyo Marakwet	Keiyo South	Soy South	Kocholwo	Enego	Water project	Barmao Emmanuel	Justus eragae	723805913	Jane	725610027	Female		Spouse	Married	Secondary	Business	Male headed, male managed	Yes		Kalenjin	2	1	2	7	6	No			No			Yes	6	100.00%	No			Yes	0.5	8.30%
170707	31/12/2020 15:15	35.62314333	0.217268333	2149.3	Questionnaire	farming		Emmanuel Barmao	Elgeiyo Marakwet	Keiyo South	Soy South	Kocholwo	Enego	Enego	Barmao Emmanuel	Justus eragae	723805913	micah	725896467	Male	48	HH(Self)	Married	Primary	Crop farmer	Male headed, male managed	Yes	48	Kalenjin	1	0	4	7	12	No			Yes	2	16.70%	Yes	10	83.30%	No			Yes
170708	31/12/2020 14:46	35.621065	0.213243333	2110	Questionnaire	farming		Emmanuel Barmao	Elgeiyo Marakwet	Keiyo South	Soy South	Kocholwo	Enego	Enego	Barmao Emmanuel	Justus	723805913		724203618	Male	40	HH(Self)	Married	Tertiary	Business	Male headed, male managed	Yes	40	Kalenjin	0	0	2	4	4	No			Yes	0.5	12.50%	Yes	1	25.00%	No			Yes	0.33	8.30%
170709	31/12/2020 14:30	35.627105	0.187693333	2640.9	Questionnaire	farming		Emmanuel Barmao	Elgeiyo Marakwet	Keiyo South	Metkei	Metkei	Metkei	Kabaateb	Barmao Emmanuel	Justus eragae	723805913	linah	720685493	Female		Spouse	Married	Primary	Crop farmer	Male headed, male managed	Yes		Kalenjin	5	0		7	8	No			Yes	0.5	6.30%	Yes	1	12.50%	No			Yes	0.13	1.60%
170710	31/12/2020 13:47	35.627825	0.179185	2690.7	Questionnaire	farming		Emmanuel Barmao	Elgeiyo Marakwet	Keiyo South	Metkei	Metkei	Tugumoi	Tugumoi	Barmao Emmanuel	Justus eragae	723805913		713163845	Male	50	HH(Self)	Married	Secondary	Crop farmer	Male headed, male managed	Yes	50	Kalenjin	2	3	2	9	10	No			Yes	1	10.00%	Yes	1	10.00%	No			No
170711	31/12/2020 13:35	35.64121667	0.16904	2764	Questionnaire	farming		Emmanuel Barmao	Elgeiyo Marakwet	Keiyo South	Metkei	Metkei	Chebusie	Chebusie	Barmao Emmanuel	Justus eragae			725896467	Male	45	HH(Self)	Married	Tertiary	Crop farmer	Male headed, male managed	Yes	45	Kalenjin	1	0	4		6	No			Yes	4	66.70%	Yes	0.5	8.30%	No			Yes	0.13	2.10%
170712	31/12/2020 12:23	35.63121667	0.169983333	2718.5	Questionnaire	farming		Emmanuel Barmao	Elgeiyo Marakwet	Keiyo South	Metkei	Kamwosor	Kiptengwer	Kiptengwer	Barmao Emmanuel	Justus eragae	723805913		700805900	Male	41	HH(Self)	Married	Secondary	Crop farmer	Male headed, male managed	Yes	41	Kalenjin	0	0	4	6	6	No			Yes	2	33.30%	Yes	1	16.70%	No			No
170714	31/12/2020 11:45	35.6007	0.219331667	2184	Questionnaire	farming		Emmanuel Barmao	Elgeiyo Marakwet	Keiyo South	Metkei	Kamwosor	Kiptengwer	Menjeiwa	Barmao Emmanuel	Justus eragae	723805913		700805900	Male	28	Child	Single	Secondary	Crop farmer	Male headed, male managed	Yes	28	Kalenjin	0	0	4	6	6	No			Yes	0.5	8.30%	Yes	1	16.70%	No			Yes	0.13	2.10%
170715	31/12/2020 11:06	35.6008	0.224881667	2159.4	Questionnaire	farming		Emmanuel Barmao	Elgeiyo Marakwet	Keiyo South	Kabiemit	Maoi	Ketigoi	menjeiwa	Barmao Emmanuel	Justus eragae	723805913	victor	715210804	Male	37	HH(Self)	Married	Secondary	Crop farmer	Male headed, male managed	Yes	37	Kalenjin	0	0	3	5	4	No			Yes	0.25	6.30%	Yes	1	25.00%	No			Yes	0.13	3.10%
170716	31/12/2020 10:38	35.59700667	0.24721	2429.2	Questionnaire	farming		Emmanuel Barmao	Elgeiyo Marakwet	Keiyo South	Kabiemit	Maoi	Ketigoi	Chepsinende	Barmao Emmanuel	Justus eragae	723805913	Peter limo	727415790	Male	37	HH(Self)	Married	Undergraduate	Crop farmer	Male headed, male managed	Yes	37	Kalenjin	0	0	2	4	2.5	No			Yes	0.25	10.00%	Yes	0.25	10.00%	No			Yes	0.13	5.00%
170717	31/12/2020 10:23	35.59722167	0.248223333	2439.2	Questionnaire	farming		Emmanuel Barmao	Elgeiyo Marakwet	Keiyo South	Kabiemit	Maoi	Ketigoi	Eoon	Barmao Emmanuel	Justus eragae	723805913		700507756	Female	30	Child	Single	Undergraduate	Business	Male headed, male managed	Yes	30	Kalenjin	3	1	6	8	3	No			No			Yes	1	33.30%	No			Yes	0.25	8.30%
170718	31/12/2020 9:47	35.59571	0.25028	2486.8	Questionnaire	farming		Emmanuel Barmao	Elgeiyo Marakwet	Keiyo South	Kabiemit	Maoi	Ketigoi	Eoon	Barmao Emmanuel	Justus eragae	723805913		703770934	Male		Child	Married	Undergraduate	Jua kali/craftsman	Male headed, male managed	Yes		Kalenjin	4	2	2	8	14	No			Yes	2	14.30%	Yes	10	71.40%	No			Yes	0.13	0.90%
170285	28/12/2020 14:49	35.54161	0.376983333	2595.8	Questionnaire	Tree growing		Gladys	Elgeiyo Marakwet	Keiyo South	Chepkorio	Marichor	Kamelil	Kamelil	Gladys kiriswa	Justus eregae	723805913	Emmanuel sirma	719481003	Male	45	HH(Self)	Married	Tertiary	Crop farmer	Male headed, male managed	Yes	45	Kalenjin	2	3	2	7	4	No			Yes	1	25.00%	Yes	2	50.00%	No			Yes	0.25	6.30%
170286	28/12/2020 14:24	35.55999667	0.345688333	2685	Questionnaire	Farming		Gladys	Elgeiyo Marakwet	Keiyo South	Chepkorio	Marichor	Kamelil	Kamelil	Gladys kiriswa	Justus eregae	723805913	Ruben komen	705809945	Male	40	HH(Self)	Married	Secondary	Crop farmer	Male headed, male managed	Yes	40	Kalenjin	3	3	2	8	5	No			No			Yes	5	100.00%	No			Yes	1	20.00%
171310	28/12/2020 13:55	35.42933167	0.435908333	2318.5	Questionnaire	farmer		Oliver	Uasingishu	Ainabkoi	Kaptagat	Kipsinende	Kongasis	Kongasis	Oliver Lelan	justus		jane		Female	53	HH(Self)	Married	Tertiary	Salaried/employed	Male headed, female managed	No	25	Kalenjin	1	1	0	2	5	No			Yes	0.5	10.00%	Yes	2	40.00%	No			No
170287	28/12/2020 13:50	35.559795	0.345935	2685.4	Questionnaire	Farming		Gladys	Elgeiyo Marakwet	Keiyo South	Chepkorio	Marichor	Kamelil	Kamelil	Gladys kiriswa	Justus eregae	723805913	Caroline kiprono	726515690	Female	43	Spouse	Married	Secondary	Business	Male headed, male managed	Yes	43	Kalenjin	3	3	2	8	1	No			No			Yes	0.5	50.00%	No			Yes	0.5	50.00%
171311	28/12/2020 13:46	35.428015	0.43068	2301.3	Questionnaire	farmer		Oliver	Uasingishu	Ainabkoi	Kaptagat	Kipsinende	Kongasis	Kongasis	Oliver Lelan	justus		julius		Male	65	HH(Self)	Married	Secondary	Crop farmer	Male headed, male managed	Yes	65	Kalenjin	2	5		7	10	No			Yes	1	10.00%	Yes	3	30.00%	No			No
171312	28/12/2020 13:45	35.42259833	0.42986	2296.2	Questionnaire	farmer		Oliver	Uasingishu	Ainabkoi	Kaptagat	Kipsinende	Kongasis	Kongasis	Oliver Lelan	justus		michael		Male	47	HH(Self)	Married	Tertiary	Crop farmer	Male headed, male managed	Yes	47	Kalenjin	3	2	1	5	22	No			Yes	2	9.10%	Yes	6	27.30%	No			No
171313	28/12/2020 13:41	35.417725	0.432738333	2285.8	Questionnaire	farmer		Oliver	Uasingishu	Ainabkoi	Kaptagat	Kipsinende	Kongasis	Kongasis	Oliver Lelan	justus		Titus		Male	51	HH(Self)	Married	Secondary	Crop farmer	Male headed, male managed	Yes	51	Kalenjin	2	3	1	6	8	No			Yes	1	12.50%	Yes	4	50.00%	No			No
171314	28/12/2020 13:35	35.41134667	0.431501667	2280	Questionnaire	farmer		Oliver	Uasingishu	Ainabkoi	Kaptagat	Kipsinende	Kongasis	Kongasis	Oliver Lelan	justus		haron	715213506	Male	58	HH(Self)	Married	Secondary	Business	Male headed, male managed	Yes	58	Kalenjin	3	1	0	4	30	No			Yes	4	13.30%	Yes	10	33.30%	No			No
171315	28/12/2020 13:35	35.40962833	0.433881667	2296.3	Questionnaire	farmer		Oliver	Uasingishu	Ainabkoi	Kaptagat	Kipsinende	Kongasis	Kongasis	Oliver Lelan	justus		rachael		Female	54	HH(Self)	Married	Secondary	Crop farmer	Male headed, female managed	Yes	54	Kalenjin	3	3	0	6	16	No			Yes	2	12.50%	Yes	8	50.00%	No			No
170284	28/12/2020 13:33	35.58170667	0.379395	2703.4	Questionnaire	farming		Karen	Elgeiyo Marakwet	Keiyo South	Chepkorio	Marichor	Cherota	Yatane	Caren	Justus		Helen korosi		Female	50	Parent	Married	Secondary	Crop farmer	Male headed, female managed	No	15	Kalenjin	4	1	5	7	10	No			Yes	0.5	5.00%	Yes	2	20.00%	No			No
171316	28/12/2020 13:27	35.40187667	0.435411667	2273.5	Questionnaire	working		Oliver	Uasingishu	Ainabkoi	Kaptagat	Kipsinende	Kongasis	Kongasis	Oliver Lelan	justus		esther		Female	44	HH(Self)	Widowed	Undergraduate	Salaried/employed	Female headed, female managed	Yes	44	Kalenjin	2	3	0	5	12	No			Yes	0.5	4.20%	Yes	2	16.70%	No			No
170288	28/12/2020 13:23	35.55997667	0.347616667	2687.9	Questionnaire	Farming		Gladys	Elgeiyo Marakwet	Keiyo South	Chepkorio	Marichor	Kamelil	Kamelil	Gladys kiriswa	Justus eregae	723805913	Irine kosgei	727837525	Female	31	Spouse	Married	Primary	Business	Male headed, male managed	No	1	Kalenjin	1	1	3	5	1	No			No			Yes	0.5	50.00%	No			Yes	0.5	50.00%
171317	28/12/2020 13:21	35.39359333	0.435843333	2267.8	Questionnaire	working		Oliver	Uasingishu	Ainabkoi	Kaptagat	Kipsinende	Kipsinende	Kongasis	Oliver Lelan	justus		kiptete		Male	49	HH(Self)	Married	Primary	Salaried/employed	Male headed, female managed	No	12	Kalenjin	2	5	2	7	2	No			Yes	0.1	5.00%	Yes	0.75	37.50%	No			No
171318	28/12/2020 13:20	35.38603333	0.437888333	2236.1	Questionnaire	working		Oliver	Uasingishu	Ainabkoi	Kaptagat	Kipsinende	Kongasis	Kongasis	Oliver Lelan	justus		haron		Male		HH(Self)	Married	Secondary	Business	Male headed, female managed	Yes		Kalenjin	3	3	0	6	16	No			Yes	4	25.00%	Yes	4	25.00%	No			No
170283	28/12/2020 13:14	35.580155	0.377686667	2702.8	Questionnaire	farming		Karen	Elgeiyo Marakwet	Keiyo South	Chepkorio	Marichor	Cherota	Yatane	Caren	justus		Aron yego		Male	47	Parent	Married	Secondary	Crop farmer	Male headed, female managed	Yes	47	Kalenjin	1	2	1	5	10	No			Yes	1	10.00%	Yes	1	10.00%	No			Yes	0.5	5.00%
171319	28/12/2020 13:12	35.38361667	0.437111667	2237.5	Questionnaire	farmer		Oliver	Uasingishu	Ainabkoi	Kaptagat	Kipsinende	Kongasis	Kongasis	Oliver Lelan	justus		butia		Female	58	HH(Self)	Widowed	Secondary	Crop farmer	Female headed, female managed	Yes	58	Kalenjin	3	2	0	5	5	No						Yes	5	100.00%	No
170305	28/12/2020 13:01	35.372175	0.437835	2221	Questionnaire	farmer		Oliver	Uasingishu	Ainabkoi	Kaptagat	Kipsinende	Kipsinende	Berur	Oliver Lelan	justus		keter		Male	25	HH(Self)	Single	Primary	Crop farmer	Male headed, male managed	Yes	25	Kalenjin	3	2	0	5	8	No			Yes	2	25.00%	Yes	6	75.00%	No			No
170289	28/12/2020 12:55	35.559505	0.347658333	2682.7	Questionnaire	Farming		Gladys	Elgeiyo Marakwet	Keiyo South	Chepkorio	Marichor	Kamelil	Kipsumanja	Gladys kiriswa	Justus	723805913	Agnes cheruiyot	729938157	Female	40	Spouse	Married	Primary	Crop farmer	Male headed, male managed	No	20	Kalenjin	3	2	6	11	1	No			No			Yes	0.5	50.00%	No			Yes	0.25	25.00%
170306	28/12/2020 12:55	35.378835	0.448158333	2234.8	Questionnaire	farmer		Oliver	Uasingishu	Ainabkoi	Kaptagat	Kaptagat	Kipsinende	Berur	Oliver Lelan	justus		pastor kim		Male	42	HH(Self)	Married	Secondary	Crop farmer	Male headed, male managed	Yes	42	Kalenjin	2	2	2	4	1	No			No			Yes	0.8	80.00%	No			No
170307	28/12/2020 12:54	35.386835	0.452536667	2248.1	Questionnaire	farmer		Oliver	Uasingishu	Ainabkoi	Kaptagat	Kaptagat	Kipsinende	Berur	Oliver Lelan	justus		nancy		Female	56	HH(Self)	Married	Undergraduate	Salaried/employed	Male headed, female managed	No	15	Kalenjin	2	3	0	5	2	No			No			Yes	0.5	25.00%	No			No
170282	28/12/2020 12:41	35.57568333	0.376143333	2659.9	Questionnaire	farming		Karen	Elgeiyo Marakwet	Keiyo South	Chepkorio	Marichor	Cherota	Cherota	Caren	justus		rose kemboi		Female	45	Parent	Married	Secondary	Crop farmer	Male headed, female managed	Yes	45	Kalenjin	3	4	5	10	10	Yes	0.33	3.30%	Yes	0.5	5.00%	Yes	1	10.00%	No			Yes	0.33	3.30%
170280	28/12/2020 12:26	35.57978	0.376073333	2701.7	Questionnaire	farming		Karen	Elgeiyo Marakwet	Keiyo South	Chepkorio	Marichor	Lelbonet	Lelbonet	Caren	Justus		Joseph sawe		Male	55	Parent	Married	Secondary	Crop farmer	Male headed, female managed	Yes	55	Kalenjin	3	2	0	7	15	Yes	0.5	3.30%	Yes	1	6.70%	Yes	3	20.00%	No			Yes	0.5	3.30%
170290	28/12/2020 11:37	35.564815	0.30089	2695.2	Questionnaire	Farming		Gladys	Elgeiyo Marakwet	Keiyo South	Kabiemit	Kabiemit	Kapchebelel	Sawaa	Gladys kiriswa	Justus eregae	723805913	Borence koech		Male	36	Spouse	Married	Secondary	Crop farmer	Male headed, male managed	No	12	Kalenjin	1	1	5	7	5.5	No			No			Yes	3	54.50%	No			Yes	1	18.20%
170279	28/12/2020 11:35	35.58068333	0.360866667	2702.1	Questionnaire	tree nursery		Karen	Elgeiyo Marakwet	Keiyo South	Chepkorio	Marichor	Lelbonet	Kapmwago	Caren	justus		Ben kattam	722747303	Male	56	Parent	Married	Secondary	Crop farmer	Male headed, female managed	Yes	56	Kalenjin	3	2	0	7	20	Yes	1	5.00%	Yes	1	5.00%	Yes	5	25.00%	No			Yes	0.5	2.50%
170291	28/12/2020 11:06	35.56379833	0.299915	2696	Questionnaire	Farming		Gladys	Elgeiyo Marakwet	Keiyo South	Kabiemit	Kabiemit	Kapchebelel	Sawaa	Gladys kiriswa	Justus eregae	723805913	Elizabethkipselei		Female	45	Child	Divorced	None	Crop farmer	Female headed, female managed	Yes	45	Kalenjin	2	3	5	10	5	No			No			Yes	3	60.00%	No			Yes	1	20.00%
170278	28/12/2020 11:02	35.5789	0.356786667	2692.2	Questionnaire	farming		Karen	Elgeiyo Marakwet	Keiyo South	Chepkorio	Marichor	Lelbonet	Kapsamich	Caren	justus		Kim kimetei		Male	47	Parent	Married	Secondary	Crop farmer	Male headed, female managed	Yes	47	Kalenjin	3	2	5	7	8	No			Yes	0.33	4.10%	Yes	1	12.50%	No			Yes
170292	28/12/2020 10:29	35.56451333	0.297083333	2707.4	Questionnaire	Farming		Gladys	Elgeiyo Marakwet	Keiyo South	Kabiemit	Kabiemit	Kapchebelel	Koisagen	Gladys kiriswa	Justus eregae	723805913	Real rotich	700862722	Female	36	Spouse	Married	Primary	Crop farmer	Male headed, male managed	No	20	Kalenjin	1	2	5	8	3	No			Yes	0.25	8.30%	Yes	1	33.30%	No			Yes	0.25	8.30%
170252	28/12/2020 9:57	35.58279	0.354115	2729.5	Questionnaire	farming		Karen	Elgeiyo Marakwet	Keiyo South	Chepkorio	Marichor	Lelbonet	Kapsamich	Caren	Justus		john cheptarusi	722796686	Male	65	Parent	Married	Undergraduate	Crop farmer	Male headed, female managed	Yes	65	Kalenjin	5	2	0	9	10	Yes			Yes	0.25	2.50%	Yes	5	50.00%	No			Yes
170293	28/12/2020 9:55	35.56443167	0.297163333	2711.1	Questionnaire	Farming		Gladys	Elgeiyo Marakwet	Keiyo South	Kabiemit	Kabiemit	Kapchebelel	Sawaa	Gladys kiriswa	Justus eregae	723805913	Sharon kiptoo	723502887	Female	39	Spouse	Married	Secondary	Business	Male headed, female managed	No	15	Kalenjin	2	1	4	7	3.5	No			Yes	1	28.60%	Yes	0.25	7.10%	No			Yes	0.25	7.10%
170254	28/12/2020 9:00	35.58795	0.354436667	2729.4	Questionnaire	farming and tree nursery		Karen	Elgeiyo Marakwet	Keiyo South	Chepkorio	Marichor	Lelbonet	Kapsamich	Caren	justus		Wilson kibet		Male	56	Parent	Married	Tertiary	Crop farmer	Male headed, female managed	Yes	56	Kalenjin	3	3	0	8	6	Yes	0.25	4.20%	Yes	0.33	5.50%	Yes	0.5	8.30%	No			Yes
170255	27/12/2020 15:37	35.484555	0.540225	2443.3	Questionnaire	farming		Karen	Elgeiyo Marakwet	Keiyo North	Kamarinyi	Mutei	Kapkoi	Chekongoi	Caren	justus		Benson komen		Male	56	Parent	Married	Secondary	Crop farmer	Male headed, female managed	Yes	56	Kalenjin	3	2	3	7	15	Yes	0.5	3.30%	Yes	0.5	3.30%	Yes	4	26.70%	No			Yes	0.33	2.20%
170055	27/12/2020 14:24	35.53976333	0.263445	2619.2	Questionnaire	Farming		Gladys	Elgeiyo Marakwet	Keiyo South	Kabiemit	Kabiemit	Kapkoma	Poywech	Gladys kiriswa	Justus eregae	723805913	Mercy jebiwott	714056876	Female	49	Spouse	Married	Tertiary	Crop farmer	Male headed, female managed	No	29	Kalenjin	4	3	2		10	No			No			Yes	4	40.00%	No			Yes	1	10.00%
170056	27/12/2020 13:52	35.53796	0.26543	2623.4	Questionnaire	Farming		Gladys	Elgeiyo Marakwet	Keiyo South	Kabiemit	Kabiemit	Kapkoma	Poywech	Gladys kiriswa	Justus eregae	723805913	Anthony kemboi	720875303	Male	33	HH(Self)	Married	Secondary	Crop farmer	Male headed, male managed	Yes	33	Kalenjin	1	1	2	4	4	No			No			Yes	2	50.00%	No			Yes	0.5	12.50%
170057	27/12/2020 13:12	35.53914833	0.266238333	2623.1	Questionnaire	Farming		Gladys	Elgeiyo Marakwet	Keiyo South	Kabiemit	Kabiemit	Kapkoma	Poywech	Gladys kiriswa	Justus eregae	723805913	Sammy chumo	728726397	Male	30	HH(Self)	Married	Secondary	Crop farmer	Male headed, male managed	Yes	30	Kalenjin	1	1	1	3	2	No			No			Yes	1	50.00%	No			Yes	0.25	12.50%
170308	27/12/2020 13:11	35.359005	0.490653333	2097.9	Questionnaire	working		Oliver	Uasingishu	Ainabkoi	Kaptagat	Kaptagat	Kipsinende	Ngeleltarit	Oliver Lelan	justus		gladys		Female	35	Spouse	Married	Tertiary	Salaried/employed	Male headed, female managed	Yes	35	Kalenjin	1	3	2	4	4	No			No			Yes	3	75.00%	No			No
170294	27/12/2020 13:08	35.58545667	0.19321	2570.9	Questionnaire	farming		Emmanuel Barmao	Elgeiyo Marakwet	Keiyo South	Metkei	Kipsaos	Tugumoi	Kapsergong	Barmao Emmanuel	Justus eragae	723805913		725492485	Male	36	HH(Self)	Married	Secondary	Business	Male headed, male managed	Yes	36	Kalenjin	0	0	4	6	8	No			No			Yes	2	25.00%	No			Yes	0.5	6.30%
169881	27/12/2020 12:59	35.48523833	0.537965	2426.5	Questionnaire	farming		Karen	Elgeiyo Marakwet	Keiyo North	Kamarinyi	Mutei	Kapkoi	Chepkongoi	Caren	Justus		Esther chepchirchir	726410828	Female	58	Parent	Widowed	Primary	Crop farmer	Male headed, female managed	Yes	58	Kalenjin	0	5	0	7	13.25	Yes	0.5	3.80%	Yes	1	7.50%	Yes	8	60.40%	No			Yes	0.25	1.90%
170296	27/12/2020 12:55	35.59522833	0.193946667	2580.5	Questionnaire	farming		Emmanuel Barmao	Elgeiyo Marakwet	Keiyo South	Metkei	Kipsaos	Kapkwoni	Cheboge	Barmao Emmanuel	Justus eragae	723805913		728463643	Male	33	Child	Married	Secondary	Crop farmer	Female headed, female managed	Yes	33	Kalenjin	4	3	0	9	12	No			Yes	1	8.30%	Yes	3	25.00%	No			Yes	0.5	4.20%
170256	27/12/2020 12:46	35.47889833	0.539658333	2416.9	Questionnaire	farming		Karen	Elgeiyo Marakwet	Keiyo North	Kamarinyi	Mutei	Kapkoi	Kapkoi	Caren	Justus		john serem		Male	45	Parent	Married	Primary	Crop farmer	Male headed, female managed	Yes	45	Kalenjin	3	2	2	7	20	Yes	0.33	1.70%	Yes	0.5	2.50%	Yes	0.5	2.50%	No			Yes
170297	27/12/2020 12:41	35.59524667	0.193996667	2573.2	Questionnaire	farming		Emmanuel Barmao	Elgeiyo Marakwet	Keiyo South	Metkei	Kipsaos	Kapkwoni	Cheboge	Barmao Emmanuel	Justus eragae	723805913		723085007	Female		Spouse	Married	Secondary	Crop farmer	Male headed, male managed	No	3	Kalenjin	0	0	3	6	4	No			Yes	1	25.00%	Yes	1	25.00%	No			Yes	0.13	3.10%
170058	27/12/2020 12:39	35.53151833	0.286136667	2557.8	Questionnaire	Farming		Gladys	Elgeiyo Marakwet	Keiyo South	Kabiemit	Kabiemit	Cheboen	Cheboen	Gladys kiriswa	Justus eregae	723805913	Rose yator	722898702	Female	40	Spouse	Married	Primary	Crop farmer	Male headed, male managed	No	20	Kalenjin	4	4	1	9	5	No			No			Yes	4	80.00%	No			Yes	0.25	5.00%
170298	27/12/2020 12:27	35.61050167	0.187318333	2625.1	Questionnaire	farming		Emmanuel Barmao	Elgeiyo Marakwet	Keiyo South	Metkei	Kipsaos	Kapkwoni	Kipchorwa	Barmao Emmanuel	Justus eragae	723805913		729322221	Male	37	HH(Self)	Married	Secondary	Crop farmer	Male headed, male managed	Yes	37	Kalenjin	0	0	4	6	4	No			No			Yes	2	50.00%	No			Yes	0.25	6.30%
170299	27/12/2020 12:15	35.61001667	0.181598333	2637.7	Questionnaire	farming		Emmanuel Barmao	Elgeiyo Marakwet	Keiyo South	Metkei	Kipsaos	Kipsaos	Kapchorwa	Barmao Emmanuel	Justus eragae	723805913	Joseph	721154367	Male	47	HH(Self)	Married	Primary	Crop farmer	Male headed, male managed	Yes	47	Kalenjin	1	2	3	8	10	No			Yes	2	20.00%	Yes	3	30.00%	No			Yes	0.5	5.00%
170059	27/12/2020 11:55	35.53238667	0.285703333	2564	Questionnaire	Farming		Gladys	Elgeiyo Marakwet	Keiyo South	Kabiemit	Kabiemit	Cheboen	Cheboen	Gladys kiriswa	Justus eregae	723805913	Rose ngetich	724036669	Female	27	Child	Married	Secondary	Business	Male headed, male managed	Yes	27	Kalenjin	5	10	5	20	5	No			Yes	0.25	5.00%	Yes	2	40.00%	No			Yes	1	20.00%
170300	27/12/2020 11:41	35.61499833	0.17645	2615.3	Questionnaire	farming		Emmanuel Barmao	Elgeiyo Marakwet	Keiyo South	Metkei	Kipsaos	Tugumoi	Werep	Barmao Emmanuel	Justus eragae	723805913		722908206	Female	48	HH(Self)	Widowed	Tertiary	Business	Female headed, female managed	Yes	48	Kalenjin	1	2	6	7	6	No			Yes	0.5	8.30%	Yes	3.5	58.30%	No			Yes	0.5	8.30%
170301	27/12/2020 11:30	35.626575	0.182295	2634.8	Questionnaire	farming		Emmanuel Barmao	Elgeiyo Marakwet	Keiyo South	Metkei	Kipsaos	Tugumoi	Tugumoi	Barmao Emmanuel	Justus	723805913		723550007	Male	26	Child	Single	Tertiary	Crop farmer	Male headed, male managed	Yes	26	Kalenjin	0	0	3	5	6	No			Yes	2	33.30%	Yes	1	16.70%	No			Yes	0.13	2.10%
170060	27/12/2020 11:16	35.53442	0.285328333	2576.6	Questionnaire	Farming		Gladys	Elgeiyo Marakwet	Keiyo South	Kabiemit	Kabiemit	Cheboen	Sugutek	Gladys kiriswa	Justus eregae	723805913	Jane kipkemoi	721457155	Female	40	Spouse	Married	Secondary	Crop farmer	Male headed, female managed	No	30	Kalenjin	0	4	2	6	1.25	No			No			Yes	0.25	20.00%	No			Yes	0.25	20.00%
170302	27/12/2020 10:55	35.621655	0.176218333	2630.4	Questionnaire	farming		Emmanuel Barmao	Elgeiyo Marakwet	Keiyo South	Metkei	Kamwosor	Kapchorwa	Kaplolo	Barmao Emmanuel	Justus eragae	723805913	Julia	728993645	Male	37	HH(Self)	Married	Tertiary	Business	Male headed, male managed	Yes	37	Kalenjin	0	0	3	5	5	No			Yes	1	20.00%	Yes	2.25	45.00%	No			Yes	0.75	15.00%
170303	27/12/2020 10:41	35.544105	0.1932	2591.5	Questionnaire	farming		Emmanuel Barmao	Elgeiyo Marakwet	Keiyo South	Metkei	Kamwosor	Kapchorwa	kapchorwa	Barmao Emmanuel	Justus eragae	723805913		704048267	Male	47	HH(Self)	Married	Tertiary	Crop farmer	Male headed, male managed	Yes	47	Kalenjin	0	0	6	8	4	No			Yes	0.5	12.50%	Yes	1	25.00%	No			Yes	0.13	3.10%
170061	27/12/2020 10:37	35.52742167	0.298525	2533.2	Questionnaire	Farming		Gladys	Elgeiyo Marakwet	Keiyo South	Kabiemit	Kabiemit	Kabiemit	Kapkoroisi	Gladys kiriswa	Justus eregae	723805913	Mercy cheruiyot	702264899	Female	36	Spouse	Married	Primary	Crop farmer	Male headed, female managed	No	20	Kalenjin	1	1	6	8	1.25	No			No			Yes	0.5	40.00%	No			Yes	0.25	20.00%
170062	27/12/2020 10:02	35.52821167	0.298156667	2546.9	Questionnaire	Farming		Gladys	Elgeiyo Marakwet	Keiyo South	Kabiemit	Kabiemit	Kabiemit	Kipkoroisi	Gladys kiriswa	Justus eregae	723805913	Wilson chirchir		Male	39	HH(Self)	Married	Primary	Crop farmer	Male headed, male managed	Yes	39	Kalenjin	1	1	6	8	2	No			No			Yes	1	50.00%	No			Yes	0.25	12.50%
170063	27/12/2020 9:34	35.53040667	0.296866667	2559	Questionnaire	Farming		Gladys	Elgeiyo Marakwet	Keiyo South	Kabiemit	Kabiemit	Kabiemit	Kipkoroisi	Gladys kiriswa	Justus eregae	723805913	Elzeber jepkoech	713432365	Female	45	Spouse	Married	Primary	Crop farmer	Male headed, female managed	No	30	Kalenjin	3	5	3	11	4.25	No			No			Yes	1	23.50%	No			Yes	1	23.50%
170304	27/12/2020 9:11	35.53989167	0.19243	2639.2	Questionnaire	farming		Emmanuel Barmao	Elgeiyo Marakwet	Keiyo South	Metkei	Kamwosor	Kapchorwa	Kiptenden	Barmao Emmanuel	Justus eragae	723805913		759398446	Female	35	Child	Single	Secondary	Crop farmer	Male headed, male managed	Yes	35	Kalenjin	2	1	2	7	7	No			Yes	1	14.30%	Yes	6	85.70%	No			No
170064	27/12/2020 9:01	35.53042	0.296873333	2559.2	Questionnaire	Farming		Gladys	Elgeiyo Marakwet	Keiyo South	Kabiemit	Kabiemit	Kabiemit	Kaplolo	Gladys kiriswa	Justus eregae	723805913	Salinas songok	729826894	Female	54	Spouse	Married	Primary	Crop farmer	Male headed, male managed	No	17	Kalenjin	4	4	3	11	5	No			No			Yes	3	60.00%	No			Yes	1	20.00%
169877	26/12/2020 15:18	35.49171667	0.525975	2479.2	Questionnaire	farming		Karen	Elgeiyo Marakwet	Keiyo North	Kamarinyi	Mutei	Kapkoi	Kipchawat	Caren	Justus		Amos kemboi		Male	47	Parent	Married	Secondary	Crop farmer	Male headed, female managed	Yes	47	Kalenjin	4	2	6	8	28	Yes	0.5	1.80%	Yes	1	3.60%	Yes	18.25	65.20%	Yes	2	7.10%	Yes	0.25	0.90%
169878	26/12/2020 14:33	35.49615167	0.527446667	2498.2	Questionnaire	farming		Karen	Elgeiyo Marakwet	Keiyo North	Kamarinyi	Mutei	Kapkoi	Kapbilio	Caren	Justus		Marko kiniga	722576098	Male	70	Parent	Married	Secondary	Crop farmer	Male headed, female managed	Yes	70	Kalenjin	4	1	0	6	30	Yes	0.75	2.50%	Yes	0.25	0.80%	Yes	24.75	82.50%	Yes	1	3.30%	Yes	0.25	0.80%
169879	26/12/2020 13:46	35.50120167	0.525145	2508.7	Questionnaire	Farming		Karen	Elgeiyo Marakwet	Keiyo South	Kamarinyi	Mutei	Kapkoi	Kapbilio	Caren	Justus		mitei evalyne		Male	45	Parent	Married	Secondary	Crop farmer	Male headed, female managed	Yes	45	Kalenjin	3	1	4	6	6.5	No			Yes			Yes	5.17	79.50%	Yes	0.33	5.10%	Yes
169880	26/12/2020 12:59	35.49173333	0.520415	2499.1	Questionnaire	farming		Karen	Elgeiyo Marakwet	Keiyo North	Kamarinyi	Mutei	Kapkoi	Kapkoi	Caren	Justus		Silas kibet		Male	45	Parent	Married	Secondary	Crop farmer	Male headed, female managed	Yes	45	Kalenjin	2	1	3	5	7	No			Yes			Yes	1	14.30%	No			Yes
169874	26/12/2020 9:32	35.453265	0.514746667	2359.7	Questionnaire	farmer		Oliver	Uasingishu	Moiben	Tembelio	Tembelio	Elgeiyo border	Kabukto	Oliver Lelan	justus		maria		Female	54	HH(Self)	Separated	Secondary	Crop farmer	Female headed, female managed	Yes	54	Kalenjin	0	3	0	3	2	No			No			Yes	0.5	25.00%	No			No
169875	26/12/2020 9:28	35.468255	0.520813333	2390.6	Questionnaire	farmer		Oliver	Uasingishu	Moiben	Tembelio	Tembelio	Elgeiyo border	Kabukto	Oliver Lelan	justus		christopher		Male	49	HH(Self)	Married	Secondary	Crop farmer	Male headed, female managed	Yes	49	Kalenjin	3	2	1	5	12	Yes	1	8.30%	No			Yes	5	41.70%	No			No
169876	26/12/2020 9:27	35.46837833	0.521606667	2392	Questionnaire	worker		Oliver	Uasingishu	Moiben	Tembelio	Tembelio	Elgeiyo border	Kabukto	Oliver Lelan	justus		toroitich		Male	52	HH(Self)	Married	Secondary	Crop farmer	Male headed, male managed	Yes	52	Kalenjin	4	6	2	10	17	Yes	1	5.90%	Yes	2	11.80%	Yes	5	29.40%	No			No
169132	24/12/2020 17:35	35.482115	0.431101667	2451.3	Questionnaire	Farming		Gladys	Elgeiyo Marakwet	Keiyo South	Kaptarakwa	Kaptarakwa	Kaptagat	Taachasis	Gladys kiriswa	Justus eregae	723805913	Samwel kiplagat	716492104	Male	40	HH(Self)	Married	Secondary	Crop farmer	Male headed, male managed	Yes	40	Kalenjin	3	3	1	7	3	No			No			Yes	1	33.30%	No			Yes	1	33.30%
169136	24/12/2020 13:52	35.56139667	0.194708333	2587.4	Questionnaire	farming		Emmanuel Barmao	Elgeiyo Marakwet	Keiyo South	Metkei	Kamwosor	Chemaech	Chemaech	Barmao Emmanuel	Justus eragae	723805913	kishoto	726414198	Male		HH(Self)	Married	Tertiary	Business	Male headed, male managed	Yes		Kalenjin	0	0	3	5	14	No			Yes			No			No			No
169137	24/12/2020 13:29	35.56602167	0.199508333	2599	Questionnaire	farming		Emmanuel Barmao	Elgeiyo Marakwet	Keiyo South	Metkei	Kamwosor	Chemaech	Chemaech	Barmao Emmanuel	Justus eragae	723805913	Gladys	724553865	Female	34	Spouse	Married	Primary	Crop farmer	Male headed, male managed	No	19	Kalenjin	0	0	3	5	1	No			Yes	0.25	25.00%	Yes	0.5	50.00%	No			Yes	0.13	12.50%
169133	24/12/2020 13:08	35.474915	0.376036667	2422.1	Questionnaire	Tree and flowers nursery		Gladys	Elgeiyo Marakwet	Keiyo South	Chepkorio	Marichor	Flax	Flax	Gladys kiriswa	Justus eregae	723805913	Margaret kemboi	724037800	Female	35	Spouse	Married	Secondary	Crop farmer	Male headed, male managed	No	10	Kalenjin	2	1	1	5	1	No			No			No			No			Yes	0.25	25.00%
169134	24/12/2020 12:38	35.479375	0.37915	2428.4	Questionnaire	Farming		Gladys	Elgeiyo Marakwet	Keiyo South	Chepkorio	Marichor	Flax	Flax	Gladys kiriswa	Justus eregae	723805913	Silas komen	705239400	Male	40	Parent	Married	Primary	Crop farmer	Male headed, male managed	Yes	40	Kalenjin	4	3	0	7	4	No			No			No			No			Yes	1	25.00%
169138	24/12/2020 12:10	35.577455	0.189973333	2587.4	Questionnaire	farming		Emmanuel Barmao	Elgeiyo Marakwet	Keiyo South	Metkei	Kamwosor	Kamwosor	Kamwosor	Barmao Emmanuel	Justus eragae	723805913	benard sitienei	728139244	Male	40	HH(Self)	Married	Secondary	Crop farmer	Male headed, male managed	Yes	40	Kalenjin	0	0	4	6	6	No			Yes	0.5	8.30%	Yes	1	16.70%	No			Yes	0.25	4.20%
169139	24/12/2020 11:48	35.57743167	0.189976667	2591.7	Questionnaire	farming		Emmanuel Barmao																																				No
169135	24/12/2020 11:25	35.47497667	0.376016667	2418.9	Questionnaire	Farming		Gladys	Elgeiyo Marakwet	Keiyo South	Chepkorio	Marichor	Flax	Flax	Gladys kiriswa	Justus eregae	723805913	Redemta cheruiyot	722430024	Female	30	Spouse	Married	Tertiary	Crop farmer	Male headed, male managed	No	3	Kalenjin	1	1	2	4	2	No			No			Yes	1	50.00%	No			Yes	0.5	25.00%
169140	24/12/2020 11:04	35.57991	0.1908	2584	Questionnaire	farming		Emmanuel Barmao	Elgeiyo Marakwet	Keiyo South	Metkei	Kamwosor	Kibomet	Kibomet	Barmao Emmanuel	Justus eragae	723805913	kobilo koech		Female	70	Spouse	Married	None	Crop farmer	Male headed, male managed	Yes	70	Kalenjin	1	0	0	2	7	No						Yes	0.5	7.10%	No			Yes	0.25	3.60%
169141	24/12/2020 10:38	35.58697167	0.196376667	2599.1	Questionnaire	farming		Emmanuel Barmao	Elgeiyo Marakwet	Keiyo South	Metkei	Kamwosor	Kimamet	Kimamet	Barmao Emmanuel	Justus eragae	723805913	naomi	729369678	Female	34	Spouse	Married	Primary	Crop farmer	Male headed, male managed	No	14	Kalenjin	0	0	5	7	8	No			Yes	0.25	3.10%	Yes	0.5	6.30%	No			Yes	0.25	3.10%
169142	24/12/2020 10:13	35.58672667	0.196178333	2598.1	Questionnaire	farming		Emmanuel Barmao	Elgeiyo Marakwet	Keiyo South	Metkei	Kamwosor	Kimamet	Kimamet	Barmao Emmanuel	Justus eragae	723805913	nelson	726707042	Male	37	HH(Self)	Married	Secondary	Crop farmer	Male headed, male managed	Yes	37	Kalenjin	0	0	3	5	6	No			Yes	0.5	8.30%	Yes	2	33.30%	No			Yes	0.25	4.20%
169143	24/12/2020 9:49	35.58678333	0.196233333	2609.4	Questionnaire	farming		Emmanuel Barmao	Elgeiyo Marakwet	Keiyo South	Metkei	Kamwosor	Kimamet	Kimamet	Barmao Emmanuel	Justus eragae	723805913	Nelson	725546211	Male	40	HH(Self)	Married	Primary	Crop farmer	Male headed, male managed	Yes	40	Kalenjin	0	0	3	5	7	No			Yes	0.25	3.60%	Yes	1	14.30%	Yes	0.25	3.60%	Yes	0.13	1.80%
169144	24/12/2020 9:00	35.58504333	0.20328	2584.1	Questionnaire	farming		Emmanuel Barmao	Elgeiyo Marakwet	Keiyo South	Metkei	Kamwosor	Kombatich	Kobeche	Barmao Emmanuel	Justus eragae	723805913	Milton kiplimo	745933654	Male	20	Child	Single	Secondary	Crop farmer	Male headed, male managed	Yes	20	Kalenjin	0	0	7	9	7	No			Yes	1	14.30%	Yes	0.5	7.10%	No			Yes	0.25	3.60%
169145	24/12/2020 8:40	35.582225	0.207191667	2628.2	Questionnaire	farming		Emmanuel Barmao	Elgeiyo Marakwet	Keiyo South	Metkei	Kamwosor	Kombatich	Kobeche	Barmao Emmanuel	Justus	723805913		705690621	Male	35	HH(Self)	Married	Primary	Crop farmer	Male headed, male managed	Yes	35	Kalenjin	0	0	2		6	No			Yes	1	16.70%	Yes	1	16.70%	No			Yes	0.25	4.20%
169722	23/12/2020 16:08	35.56898333	0.429541667	2693.8	Questionnaire	farming		Karen	Elgeiyo Marakwet	Keiyo South	Kaptarakwa	Marichor	Mosop	Kiptulos	Caren	Justus		Sharon kibet		Female	55	Parent	Married	Secondary	Crop farmer	Male headed, female managed	Yes	55	Kalenjin	5	2	4	9	16	No			Yes	1	6.30%	Yes	2	12.50%	No			No
169440	23/12/2020 15:52	35.58125333	0.41552	2748.6	Questionnaire	farming		Karen	Elgeiyo Marakwet	Keiyo South	Kaptarakwa	Mosop	Kiptulos	Chemarikachi	Caren	Justus		jocye kipsait		Female	75	Parent	Married	Secondary	Crop farmer	Male headed, female managed	Yes	75	Kalenjin	1	2	4	5	10	No			Yes			Yes	9.67	96.70%	No			Yes	0.33	3.30%
169318	23/12/2020 15:28	35.58196167	0.394946667	2753.9	Questionnaire	farming		Karen	Elgeiyo Marakwet	Keiyo South	Kaptarakwa	Marichor	Kapkenda	Choroge	Caren	Justus		Godwin biwott		Female	35	Parent	Married	Secondary	Crop farmer	Male headed, female managed	Yes	35	Kalenjin	4	2	6	8	13	No			Yes			Yes	6.67	51.30%	No			Yes	0.33	2.60%
169317	23/12/2020 15:07	35.577025	0.392961667	2741.9	Questionnaire	farming		Karen	Elgeiyo Marakwet	Keiyo South	Kaptarakwa	Mosop	Kapkenda	kiptenten	Caren	Justus		William kiptanui		Male	58	Parent	Married	Primary	Crop farmer	Male headed, female managed	Yes	58	Kalenjin	1	3	2	6	10	No			Yes			Yes	1	10.00%	No			Yes	0.33	3.30%
168691	23/12/2020 14:41	35.57727333	0.346593333	2732.4	Questionnaire	Farming		Gladys	Elgeiyo Marakwet	Keiyo South	Chepkorio	Nyaru	Samich	Chebirei	Gladys kiriswa	Justus eregae	723805913	Miriam sawe	722154072	Female	37	Spouse	Married	Secondary	Crop farmer	Male headed, male managed	No	5	Kalenjin	2	1	1	4	4	No			No			Yes	2	50.00%	No			Yes	1	25.00%
169261	23/12/2020 14:29	35.567955	0.395058333	2677.2	Questionnaire	farming		Karen	Elgeiyo Marakwet	Keiyo South	Kaptarakwa	Mosop	Kapkenda	Kaplokoi	Caren	Justus		grace jeptum	798457153	Female	58	Parent	Widowed	Primary	Crop farmer	Female headed, female managed	Yes	58	Kalenjin	2	3	1	8	11	No			Yes			Yes	0.5	4.50%	No			Yes	0.33	3.00%
168692	23/12/2020 14:07	35.57729833	0.347098333	2742.5	Questionnaire	Farming		Gladys	Elgeiyo Marakwet	Keiyo South	Chepkorio	Nyaru	Samich	Chebirei	Gladys kiriswa	Justus eregae	723805913	Rose barmasai	701872024	Female	36	Child	Single	Primary	Crop farmer	Male headed, male managed	Yes	36	Kalenjin	2	2	3	7	2	No			No			Yes	1	50.00%	No			Yes	0.25	12.50%
168715	23/12/2020 13:53	35.567965	0.215035	2591.6	Questionnaire	farming		Emmanuel Barmao	Elgeiyo Marakwet	Keiyo South	Kabiemit	Maoi	Kipkamwo	Tinone	Barmao Emmanuel	Justus eragae	723805913	kiptoo	729772741	Male	35	HH(Self)	Married	Secondary	Crop farmer	Male headed, male managed	Yes	35	Kalenjin	0	0	2	5	10.5	No			Yes	2	19.00%	Yes	2	19.00%	No			No
169188	23/12/2020 13:32	35.55887833	0.392026667	2635.4	Questionnaire	teacher, farming		Karen	Elgeiyo Marakwet	Keiyo South	Kaptarakwa	Mosop	Kapkenda	Kapkenda	Caren	Justus		Paul sang		Male	45	Parent	Married	Postgraduate	Salaried/employed	Male headed, female managed	Yes	45	Kalenjin	3	2	5	7	11	No			Yes			Yes	10	90.90%	No			Yes
168693	23/12/2020 13:23	35.57855333	0.339283333	2727.7	Questionnaire	Farming		Gladys	Elgeiyo Marakwet	Keiyo South	Chepkorio	Nyaru	Kipsaina	Kipsaina	Gladys kiriswa	Justus eregae	723805913	Paul komen	728407887	Male	40	HH(Self)	Married	Primary	Crop farmer	Male headed, male managed	Yes	40	Kalenjin	4	3	1	8	3	No			No			Yes	1	33.30%	No			Yes	1	33.30%
169187	23/12/2020 13:12	35.55887333	0.391173333	2626.1	Questionnaire	farming		Karen	Elgeiyo Marakwet	Keiyo South	Kaptarakwa	Mosop	Kapkenda	Kapkenda	Caren	Justus		Naomi jelagat		Female	32	Parent	Married	Secondary	Crop farmer	Male headed, female managed	No	3	Kalenjin	2		2	4	15	Yes			Yes			Yes	15	100.00%	No			Yes
168716	23/12/2020 13:04	35.58225	0.236108333	2618.9	Questionnaire	farming		Emmanuel Barmao	Elgeiyo Marakwet	Keiyo South	Kabiemit	Maoi	Kapkitony	Kogibor	Barmao Emmanuel	Justus eragae	723805913			Male	60	HH(Self)	Married	Primary	Business	Male headed, male managed	Yes	60	Kalenjin	2	4	1	9	10.25	Yes	0.5	4.90%	No			Yes	6.25	61.00%	No			No
169189	23/12/2020 12:42	35.43984	0.50526	2323	Questionnaire	farmer		Oliver	Uasingishu	Moiben	Tembelio	Tembelio	Elgeiyo border	Moim	Oliver Lelan	justus		Christopher	723615210	Male	52	HH(Self)	Married	Secondary	Crop farmer	Male headed, male managed	Yes	52	Kalenjin	3	4	3	7	6	No			No			Yes	2	33.30%	No			No
168694	23/12/2020 12:39	35.57950167	0.338193333	2753.8	Questionnaire	Farming		Gladys	Elgeiyo Marakwet	Keiyo South	Chepkorio	Nyaru	Kipsaina	Kipsaina	Gladys kiriswa	Justus eregae	723805913	Gladys kigen	729172873	Female	25	Child	Married	Undergraduate	Salaried/employed	Male headed, male managed	Yes	25	Kalenjin	3	3	2	8	10	No			No			Yes	5	50.00%	No			Yes	1	10.00%
168717	23/12/2020 12:39	35.59344667	0.229333333	2616.9	Questionnaire	farming		Emmanuel Barmao	Elgeiyo Marakwet	Keiyo South	Kapkwoni	Metkei	Kombatich	Kogibor	Barmao Emmanuel	Justus eragae	723805913		729057970	Male	40	HH(Self)	Married	Secondary	Crop farmer	Male headed, male managed	Yes	40	Kalenjin	0	0	4	8	7	No			No			No			No			Yes	0.5	7.10%
169190	23/12/2020 12:38	35.44579167	0.510118333	2330.2	Questionnaire	farmer		Oliver	Uasingishu	Moiben	Tembelio	Tembelio	Elgeiyo border	Elgeiyo border	Oliver Lelan	justus		kimoning		Male	55	HH(Self)	Married	Secondary	Crop farmer	Male headed, male managed	Yes	55	Kalenjin	4	3	4	7	12	No			Yes	2	16.70%	Yes	4	33.30%	No			No
169186	23/12/2020 12:36	35.55351167	0.388541667	2598.8	Questionnaire	farming		Karen	Elgeiyo Marakwet	Keiyo South	Kaptarakwa	Kapkenda	Kapkenda	Kapkenda	Caren	Justus		Francis limo	720999415	Male	71	Parent	Married	Primary	Crop farmer	Male headed, female managed	Yes	71	Kalenjin	3	8	2	12	10	No			Yes			Yes	9.67	96.70%	No			Yes	0.33	3.30%
168979	23/12/2020 12:29	35.45237833	0.517733333	2342.6	Questionnaire	farmer		Oliver	Uasingishu	Moiben	Tembelio	Tembelio	Elgeiyo border	Moim	Oliver Lelan	justus		maria		Female	42	HH(Self)	Married	Secondary	Crop farmer	Male headed, female managed	Yes	42	Kalenjin	3	3	2	6	11	No			No			Yes	4	36.40%	No			No
168980	23/12/2020 12:28	35.446305	0.522221667	2335.6	Questionnaire	working		Oliver	Uasingishu	Moiben	Tembelio	Tembelio	Elgeiyo border	Moim	Oliver Lelan	justus				Male	54	HH(Self)	Married	Tertiary	Crop farmer	Male headed, female managed	Yes	54	Kalenjin	5	1	2	6	11	No			Yes	4	36.40%	Yes	5	45.50%	No			No
168981	23/12/2020 12:21	35.44224333	0.522613333	2325.3	Questionnaire	farmer		Oliver	Uasingishu	Moiben	Tembelio	Tembelio	Elgeiyo border	Koibagurio	Oliver Lelan	justus		bargesem		Male	37	HH(Self)	Married	Secondary	Crop farmer	Male headed, male managed	Yes	37	Kalenjin	2	2	2	4	5.5	No			No			Yes	2	36.40%	No			No
168982	23/12/2020 12:20	35.436825	0.527185	2316.9	Questionnaire	farmer		Oliver	Uasingishu	Moiben	Tembelio	Tembelio	Elgeiyo border	Koibagurio	Oliver Lelan	justus		masit		Male	53	HH(Self)	Married	Secondary	Crop farmer	Male headed, male managed	Yes	53	Kalenjin	3	3	2	6	8	No			Yes	0.5	6.30%	Yes	7.5	93.80%	No			No
169131	23/12/2020 12:16	35.55015833	0.388766667	2575.1	Questionnaire	farming		Karen	Elgeiyo Marakwet	Keiyo South	Kaptarakwa	Marichor	Kapkenda	Kuwale	Caren	Justus		Richard kibet		Male	35	Parent	Married	Secondary	Crop farmer	Male headed, female managed	Yes	35	Kalenjin	0	3	3	5	12	No			Yes	0.75	6.30%	Yes	11.25	93.80%	No			No
168983	23/12/2020 12:15	35.43370833	0.532698333	2309.6	Questionnaire	working		Oliver	Uasingishu	Moiben	Tembelio	Tembelio	Elgeiyo border	Kapsosio	Oliver Lelan	justus		nyota		Male	47	HH(Self)	Married	Secondary	Crop farmer	Male headed, male managed	Yes	47	Kalenjin	4	3	2	7	6	No			Yes	1	16.70%	Yes	3	50.00%	No			No
168730	23/12/2020 12:06	35.440705	0.536413333	2343.1	Questionnaire	farmer		Oliver	Uasingishu	Moiben	Tembelio	Tembelio	Kapkei	Kapkei	Oliver Lelan	justus		jeremiah	7245950673	Female	53	HH(Self)	Married	Secondary	Crop farmer	Male headed, male managed	Yes	53	Kalenjin	3	3	2	6	5	No			No			Yes	2	40.00%	No			No
168695	23/12/2020 12:04	35.58002167	0.336978333	2750.3	Questionnaire	Farming		Gladys	Elgeiyo Marakwet	Keiyo South	Chepkorio	Nyaru	Kipsaina	Kipsaina	Gladys kiriswa	Justus eregae	723805913	Priscillachebet	727211989	Female	40	Spouse	Married	Secondary	Crop farmer	Male headed, male managed	No	10	Kalenjin	2	1	3	6	5	No			No			Yes	1	20.00%	No			Yes	1	20.00%
168718	23/12/2020 12:03	35.59352	0.229351667	2616.1	Questionnaire	farming		Emmanuel Barmao	Elgeiyo Marakwet	Keiyo South	Kabiemit	Maoi	Kapkitony	Kipchain	Barmao Emmanuel	Justus eragae	723805913		727376646	Male	70	HH(Self)	Married	Primary	Crop farmer	Male headed, male managed	Yes	70	Kalenjin	2	3	0	7	2	No			No			Yes	0.5	25.00%	No			Yes	0.13	6.30%
168711	23/12/2020 12:01	35.445385	0.542101667	2333.9	Questionnaire	working		Oliver	Uasingishu	Moiben	Tembelio	Tembelio	Kapkei	Kapkei	Oliver Lelan	justus		Ruto	7238235478	Male	48	HH(Self)	Married	Primary	Salaried/employed	Male headed, female managed	Yes	48	Kalenjin	2	4	2	6	15	No			No			Yes	7	46.70%	No			No
168712	23/12/2020 12:00	35.45341167	0.54139	2349.8	Questionnaire	farmer		Oliver	Uasingishu	Moiben	Tembelio	Tembelio	Kapkei	Kapkei	Oliver Lelan	justus				Male	42	HH(Self)	Married	Primary	Crop farmer	Male headed, male managed	Yes	42	Kalenjin	3	2	1	5	3	No			No			Yes	1	33.30%	No			No
168713	23/12/2020 11:49	35.46661333	0.543593333	2406.8	Questionnaire	working		Oliver	Uasingishu	Moiben	Tembelio	Tembelio	Kapkei	Kapkei	Oliver Lelan	justus		Ronoh		Female	47	HH(Self)	Married	Secondary	Salaried/employed	Male headed, female managed	Yes	47	Kalenjin	4	4	0	8	15	No			Yes	2	13.30%	Yes	4	26.70%	No			No
168714	23/12/2020 11:48	35.47066	0.546628333	2335.6	Questionnaire	farmer1		Oliver	Uasingishu	Moiben	Tembelio	Tembelio	Kapkei	Kapkei	Oliver Lelan	justus		robert		Male	36	HH(Self)	Married	Primary	Crop farmer	Male headed, male managed	Yes	36	Kalenjin	2	1	1	3	4	No			Yes	0.5	12.50%	Yes	1.5	37.50%	No			No
169130	23/12/2020 11:44	35.54708667	0.384713333	2601.8	Questionnaire	tree nursery/ farming		Karen	Elgeiyo Marakwet	Keiyo South	Chepkorio	Marichor	Chepkorio	Samitwo	Caren	Justus		Jackson chesire	701633790	Male	62	Parent	Married	Primary	Crop farmer	Male headed, female managed	Yes	62	Kalenjin	2	3	0	5	6	No			Yes			Yes	1	16.70%	No			Yes	0.33	5.60%
168696	23/12/2020 11:29	35.57941667	0.337003333	2754.1	Questionnaire	Farming		Gladys	Elgeiyo Marakwet	Keiyo South	Chepkorio	Nyaru	Kipsaina	Kipsaina	Gladys kiriswa	Justus eregae	723805913	Edith kiptum	715470587	Female	25	Spouse	Married	Secondary	Crop farmer	Male headed, male managed	Yes	25	Kalenjin	4	3	7	14	10	No			Yes	2	20.00%	Yes	1	10.00%	No			Yes	1	10.00%
169129	23/12/2020 11:23	35.54132333	0.379706667	2592.7	Questionnaire	farming		Karen	Elgeiyo Marakwet	Keiyo South	Kaptarakwa	Marichor	Chepkorio	Ngebiri	Caren	Justus		Robinson kemboi		Male	45	Parent	Married	Secondary	Crop farmer	Male headed, female managed	Yes	45	Kalenjin	4	2	3	8	14	No			Yes	5	35.70%	Yes	4	28.60%	No			Yes	0.33	2.40%
168719	23/12/2020 11:06	35.58328167	0.224335	2634.1	Questionnaire	mixed farmingl we		Emmanuel Barmao	Elgeiyo Marakwet	Keiyo South	Kabiemit	Maoi	Kapkitony	Kipchain	Barmao Emmanuel	Justus eragae	723805913		702057238	Female	30	Child	Single	Secondary	Crop farmer	Male headed, male managed	Yes	30	Kalenjin	2	1	6		16	No			Yes	3	18.80%	Yes	2	12.50%	No			Yes	0.25	1.60%
169123	23/12/2020 11:04	35.53630833	0.383595	2591	Questionnaire	farming		Karen	Elgeiyo Marakwet	Keiyo South	Kaptarakwa	Marichor	Chepkorio	Chepkorio Center	Caren			Bernard kimutai		Male	45	Parent	Married	Secondary	Crop farmer	Male headed, female managed	Yes	45	Kalenjin	2	3	3	7	17	No			Yes	0.5	2.90%	Yes	2	11.80%	No			Yes	0.33	2.00%
168720	23/12/2020 10:37	35.581655	0.218781667	2636.3	Questionnaire	mixed farming		Emmanuel Barmao	Elgeiyo Marakwet	Keiyo South	Metkei	Kombatich	Kombatich	Kiptigei	Barmao Emmanuel	Justus	723805913		722207481	Male	28	Child	Single	Tertiary	Jua kali/craftsman	Male headed, male managed	Yes	28	Kalenjin	0	0	0	1	5	No			Yes	0.25	5.00%	No			No			Yes	0.13	2.50%
168697	23/12/2020 10:35	35.57300167	0.322593333	2737.5	Questionnaire	Farming		Gladys	Elgeiyo Marakwet	Keiyo South	Chepkorio	Nyaru	Mwen	Mwen	Gladys kiriswa	Justus eregae	723805913	Gladys kogei	791021840	Female	26	Spouse	Married	Primary	Crop farmer	Male headed, male managed	No	8	Kalenjin	1	1	3	5	0.5	No			No			Yes	0.25	50.00%	No			Yes	0.25	50.00%
168698	23/12/2020 9:57	35.571	0.3222	2736.5	Questionnaire	Farming		Gladys	Elgeiyo Marakwet	Keiyo South	Chepkorio	Nyaru	Mwen	Mwen	Gladys kiriswa	Justus eregae	723805913	Nicolecherusei	702175067	Female	24	Spouse	Married	Secondary	Crop farmer	Male headed, female managed	No	7	Kalenjin	1	1	3	5	0.75	No			No			Yes	0.25	33.30%	No			Yes	0.25	33.30%
169124	23/12/2020 9:48	35.53843333	0.38374	2604.7	Questionnaire	farming		Karen	Elgeiyo Marakwet	Keiyo South	Kaptarakwa	Marichor	Chepkorio	Ngebiri	Caren	Justus		Jane kemboi		Female	29	Parent	Married	Secondary	Crop farmer	Male headed, female managed	No	2	Kalenjin	1	1	0	4	10	No			Yes			Yes	1.67	16.70%	No			Yes	0.33	3.30%
168699	23/12/2020 9:30	35.57213167	0.322206667	2730.1	Questionnaire	Farming		Gladys	Elgeiyo Marakwet	Keiyo South	Chepkorio	Nyaru	Mwen	Mwen	Gladys kiriswa	Justus eregae	723805913	David koech	727007441	Male	22	HH(Self)	Married	Secondary	Crop farmer	Male headed, male managed	Yes	22	Kalenjin	1	1	1	3	1.2	No			No			Yes	1	83.30%	No			Yes	0.25	20.80%
169125	23/12/2020 9:16	35.53976167	0.381568333	2609.1	Questionnaire	farming		Karen	Elgeiyo Marakwet	Keiyo South	Chepkorio	Marichor	Chepkorio	Ngebiri	Caren	Justus		Sally kemboi	728063265	Female	43	Parent	Married	Secondary	Crop farmer	Male headed, female managed	No	20	Kalenjin	2	2	4	6	2.5	No			Yes			Yes	1.67	66.80%	No			Yes	0.33	13.30%
168721	23/12/2020 9:14	35.582125	0.219031667	2637.8	Questionnaire	mixed farming		Emmanuel Barmao	Elgeiyo Marakwet	Keiyo South	Metkei	Kapkwoni	Kamwosor	Kombatich	Barmao Emmanuel	Justus eragae	723805913		725567911	Female	40	HH(Self)	Married	Primary	Crop farmer	Male headed, male managed	Yes	40	Kalenjin	0	0	5	7	4	No			Yes	0.25	6.30%	Yes	1	25.00%	No			Yes	0.13	3.10%
168700	23/12/2020 8:48	35.57347167	0.323211667	2739.2	Questionnaire	Farming		Gladys	Elgeiyo Marakwet	Keiyo South	Chepkorio	Nyaru	Mwen	Mwen	Gladys kiriswa	Justuseregae	723805913	Jonahcheruiyot	733638377	Male	45	HH(Self)	Married	Secondary	Crop farmer	Male headed, male managed	Yes	45	Kalenjin	4	3	2	9	1	No			No			Yes	0.25	25.00%	No			Yes	0.25	25.00%
168722	23/12/2020 8:43	35.54850833	0.244416667	2502.2	Questionnaire	farming		Emmanuel Barmao	Elgeiyo Marakwet	Keiyo South	Kabiemit	Maoi	Kapkitony	Kogibor	Barmao Emmanuel	Justus eragae	723805913	Dickson	720547367	Male	55	HH(Self)	Married	Secondary	Crop farmer	Male headed, male managed	Yes	55	Kalenjin	3	2	6	9	20.5	No			Yes	2	9.80%	Yes	5	24.40%	No			Yes	0.25	1.20%
169126	23/12/2020 8:35	35.54502667	0.382246667	2612	Questionnaire	farming		Karen	Elgeiyo Marakwet	Keiyo South	Chepkorio	Marichor	Chepkorio	Samitwo	Caren	Justus		Agnes kiptum		Female	55	Parent	Single	None	Crop farmer	Female headed, female managed	Yes	55	Kalenjin	6	4	10	11	5	No			Yes	0.33	6.70%	Yes	1	20.00%	No			Yes	0.33	6.70%
169127	23/12/2020 8:14	35.54499833	0.382261667	2606.2	Questionnaire	farming		Karen	Elgeiyo Marakwet	Keiyo South	Chepkorio	Marichor	Chepkorio	Kulwane	Caren	Justus		Thomas kipyego	705668112	Male	41	Parent	Married	Primary	Crop farmer	Male headed, female managed	Yes	41	Kalenjin	2	2	0	4	11.5	No			Yes	0.33	2.90%	Yes	0.5	4.30%	No			Yes	0.33	2.90%
168423	22/12/2020 15:32	35.51075333	0.51718	2522.4	Questionnaire	farming		Karen	Elgeiyo Marakwet	Keiyo South	Kaptarakwa	Chebior	Chebior	Sariteti	Caren	justus		Bernard kiptoo	769116701	Male	27	Parent	Single	Secondary	Crop farmer	Male headed, female managed	Yes	27	Kalenjin	4	1	3	6	7	No			Yes	0.33	4.80%	Yes	1	14.30%	No			Yes	0.33	4.80%
168424	22/12/2020 15:13	35.51350833	0.51677	2508.4	Questionnaire	farming		Karen	Elgeiyo Marakwet	Keiyo South	Kaptarakwa	Kitany	Chebior	Chebior	Caren	Justus		marget jerob		Female	45	Parent	Married	Primary	Crop farmer	Male headed, female managed	No	45	Kalenjin	2	1	3	5	11	No			Yes			Yes	1	9.10%	No			Yes	0.33	3.00%
168432	22/12/2020 15:05	35.553685	0.249265	2463.5	Questionnaire	mixed farming		Emmanuel Barmao	Elgeiyo Marakwet	Keiyo South	Kabiemit	Maoi	Kipkamwo	Tinone	Barmao Emmanuel	Justus eragae	723805913	kiprop	726983911	Male	30	HH(Self)	Single	Secondary	Salaried/employed	Male headed, male managed	Yes	30	Kalenjin	1	1	0	2	21	No			Yes	5	23.80%	No			No			No
168396	22/12/2020 14:57	35.55215167	0.335595	2673.5	Questionnaire	Farming		Gladys	Elgeiyo Marakwet	Keiyo South	Chepkorio	Nyaru	Kapcheptek	Kapcheptek	Gladys kiriswa	Justus eregae	723805913	Alice sawe	727405724	Female	49	Spouse	Married	Secondary	Crop farmer	Male headed, male managed	No	30	Kalenjin	4	4	1	9	1.5	No			No			Yes	0.5	33.30%	No			Yes	0.25	16.70%
168433	22/12/2020 14:50	35.57834667	0.230131667	2602.2	Questionnaire	farming		Emmanuel Barmao	Elgeiyo Marakwet	Keiyo South	Kabiemit	Maoi	Kapkitony	Mambai	Barmao Emmanuel	Justus eragae	723805913	sokome bartocho	711275919	Male	40	HH(Self)	Married	Secondary	Crop farmer	Male headed, male managed	Yes	40	Kalenjin	1	1	6	8	10	No			Yes	1	10.00%	Yes	2	20.00%	No
168425	22/12/2020 14:45	35.51378667	0.512433333	2532.3	Questionnaire	farming		Karen	Elgeiyo Marakwet	Keiyo South	Kaptarakwa	Chebior	Chebior	Chebior	Caren	justus		Emmanuel		Male	25	Child	Single	Secondary	Crop farmer	Male headed, female managed	Yes	25	Kalenjin	4	1	2	7	11	No			Yes	1	9.10%	Yes	7.75	70.50%	No			Yes	0.25	2.30%
168431	22/12/2020 14:22	35.51526667	0.512768333	2533.9	Questionnaire	farming		Karen	Elgeiyo Marakwet	Keiyo South	Kaptarakwa	Kitany	Chebior	Torok	Caren	justus		kiprotich kemboi	710589696	Male	24	Child	Single	Primary	Crop farmer	Male headed, male managed	Yes	24	Kalenjin	2	0	2	4	8				Yes	0.5	6.30%	Yes	3.5	43.80%	No			Yes
168434	22/12/2020 14:14	35.578265	0.230116667	2615.5	Questionnaire	farming		Emmanuel Barmao	Elgeiyo Marakwet	Keiyo South	Kabiemit	Maoi	Kapkitony	Kapkitony	Barmao Emmanuel	Justus eragae	723805913		722150422	Male		Child	Single	Tertiary	Business	Female headed, female managed	Yes		Kalenjin	1	1	4	6	2	No			No			Yes	0.5	25.00%	No			Yes	0.5	25.00%
168397	22/12/2020 14:11	35.55314	0.335023333	2680.4	Questionnaire	Farming		Gladys	Elgeiyo Marakwet	Keiyo South	Chepkorio	Nyaru	Kapcheptek	Kapcheptek	Gladys kiriswa	Justus eregae	723805913	Miriam limo	704348427	Female	56	Spouse	Married	Primary	Crop farmer	Male headed, male managed	No	20	Kalenjin	4	1	2	9	2.75	No			No			Yes	0.25	9.10%	No			Yes	0.25	9.10%
169128	22/12/2020 13:57	35.52207333	0.504228333	2543.7	Questionnaire	farming		Karen	Elgeiyo Marakwet	Keiyo South	Kaptarakwa	Kitany	Chebior	Cheburusyo	Caren	Justus		Pamela korir	728800826	Female	34	Parent	Single	Primary	Crop farmer	Female headed, female managed	Yes	34	Kalenjin	1	1	2	6	7.5	No			Yes	0.5	6.70%	Yes	6.5	86.70%	No			Yes	0.33	4.40%
169112	22/12/2020 13:38	35.52172833	0.504586667	2539.1	Questionnaire	farming		Karen	Elgeiyo Marakwet	Keiyo South	Kaptarakwa	Kitany	Chebior	Chebarusiyo	Caren	Justus		Stephen langat	703828822	Male	59	Parent	Married	Primary	Crop farmer	Male headed, female managed	Yes	59	Kalenjin	1	1	0	1	6	Yes			Yes	0.5	8.30%	Yes	4.5	75.00%	No			Yes
168435	22/12/2020 13:37	35.58089833	0.244338333	2617.6	Questionnaire	farming		Emmanuel Barmao	Elgeiyo Marakwet	Keiyo South	Kabiemit	Maoi	Kapkitony	Kerio	Barmao Emmanuel	Justus	723805913		728584202	Male		HH(Self)	Married	Tertiary	Retired(pensioner)	Male headed, male managed	Yes		Kalenjin	4	3	3	8	3.5	No			No			Yes	0.25	7.10%	No			Yes	0.13	3.60%
168398	22/12/2020 13:34	35.55311833	0.334195	2666.8	Questionnaire	Farming		Gladys	Elgeiyo Marakwet	Keiyo South	Chepkorio	Nyaru	Kapcheptek	Kapcheptek	Gladys kiriswa	Justus eregae	723805913	Gladys kipkosgei	725835710	Female	38	Spouse	Married	Primary	Crop farmer	Male headed, male managed	No	10	Kalenjin	1	1	4	6	1.25	No			No			Yes	0.25	20.00%	No			Yes	0.25	20.00%
168436	22/12/2020 13:23	35.58091167	0.244328333	2614.5	Questionnaire	farming		Emmanuel Barmao	Elgeiyo Marakwet	Keiyo South	Kabiemit	Maoi	Kapkitony	Kapkitony	Barmao Emmanuel	Justus eragae	723805913	kibet	727579272	Male	30	HH(Self)	Single	Tertiary	Business	Male headed, male managed	Yes	30	Kalenjin	0	0	2	4	20	No			No			No			No			Yes	0.5	2.50%
168399	22/12/2020 13:06	35.55410167	0.333318333	2664.8	Questionnaire	Farming		Gladys	Elgeiyo Marakwet	Keiyo South	Chepkorio	Nyaru	Kapcheptek	Kapcheptek	Gladys kiriswa	Justus eregae	723805913	Rose keter	712420310	Female	32	Spouse	Married	Tertiary	Crop farmer	Male headed, male managed	No	8	Kalenjin	1	1	1	3	2	No			No			Yes	0.5	25.00%	No			Yes	0.5	25.00%
169113	22/12/2020 13:04	35.52424333	0.487593333	2564.3	Questionnaire	farming		Karen	Elgeiyo Marakwet	Keiyo South	Kaptarakwa	Kitany	Kitany	Mutwol	Caren	justus		Ruth kemboi	798254392	Female	27	Parent	Married	Secondary	Crop farmer	Male headed, female managed	Yes	27	Kalenjin	1	1	1	3	8				Yes	0.25	3.10%	Yes	6.75	84.40%	No			Yes
169114	22/12/2020 12:34	35.52811167	0.482181667	2582	Questionnaire	farming		Karen	Elgeiyo Marakwet	Keiyo South	Kaptarakwa	Kitany	Kitany	Barabakwo	Caren	Justus		Agnes kipsang		Female	40	Parent	Married	Primary	Crop farmer	Male headed, female managed	Yes	40	Kalenjin	2	1	3	5	10	No			Yes			Yes	0.5	5.00%	No			Yes
168400	22/12/2020 12:24	35.55516167	0.33229	2683.3	Questionnaire	Farming		Gladys	Elgeiyo Marakwet	Keiyo South	Chepkorio	Nyaru	Kapcheptek	Kapcheptek	Gladys kiriswa	Justus eregae	723805913	Lydia chemtai	724762732	Female	33	Spouse	Married	Primary	Crop farmer	Male headed, male managed	No	12	Kalenjin	1	1	6	8	1.25	No			No			No			No			Yes	0.5	40.00%
168437	22/12/2020 12:22	35.57654667	0.246531667	2577.1	Questionnaire	farming		Emmanuel Barmao	Elgeiyo Marakwet	Keiyo South	Kabiemit	Tumeiyo	Tambul	Tambul	Barmao Emmanuel	Justus eragae	723805913		722596002	Male	42	HH(Self)	Married	Postgraduate	Business	Male headed, male managed	Yes	42	Kalenjin	1	1	6	8	8.5	No			Yes	1	11.80%	Yes	2	23.50%	No			Yes	0.13	1.50%
169115	22/12/2020 12:07	35.52916	0.479761667	2592.4	Questionnaire	farming		Karen	Elgeiyo Marakwet	Keiyo South	Kaptarakwa	Kitany	Kitany	Koibarak	Caren	Justus		rosiana akabaya	715542498	Female	65	Parent	Widowed	Primary	Crop farmer	Female headed, female managed	No	40	Turkana	1	3	1	5	2.5	No			Yes	0.33	13.30%	Yes	1.67	66.80%				Yes	0.33	13.30%
168438	22/12/2020 11:55	35.57157167	0.251811667	2542.7	Questionnaire	farming		Emmanuel Barmao	Elgeiyo Marakwet	Keiyo South	Kabiemit	Tumeiyo	Tambul	Tambul	Barmao Emmanuel	Justus eragae	726163879		729016309	Male	36	HH(Self)	Married	Tertiary	Salaried/employed	Male headed, male managed	Yes	36	Kalenjin			4	6	3.5	No			Yes	0.5	14.30%	Yes	1	28.60%	No			Yes	0.33	9.50%
168401	22/12/2020 11:47	35.55578833	0.33279	2693.9	Questionnaire	Farming		Gladys	Elgeiyo Marakwet	Keiyo South	Chepkorio	Nyaru	Kapcheptek	Kapcheptek	Gladys kiriswa	Justus eregae	723805913	Winnie biwott	721917663	Female	45	Spouse	Married	None	Crop farmer	Male headed, male managed	No	21	Kalenjin	2	1	2	5	1.25	No			No			Yes	0.5	40.00%	No			Yes	0.25	20.00%
169116	22/12/2020 11:36	35.53391167	0.482513333	2578.7	Questionnaire	farming		Karen	Elgeiyo Marakwet	Keiyo South	Kaptarakwa	Kitany	Kitany	Kitany	Caren	Justus		samwel sang		Male	65	Parent	Married	Secondary	Crop farmer	Male headed, female managed	Yes	65	Kalenjin	5	2	3	9	7	No			Yes	0.33	4.80%	Yes	0.5	7.10%	No			Yes	0.33	4.80%
168402	22/12/2020 11:16	35.55637667	0.333086667	2687.8	Questionnaire	Farming		Gladys	Elgeiyo Marakwet	Keiyo South	Chepkorio	Nyaru	Kapcheptek	Kapcheptek	Gladys kiriswa	Justus eregae	723805913	Nelly jepkemboi	728257500	Female	40	Spouse	Married	Secondary	Crop farmer	Male headed, female managed	No	6	Kalenjin	2	2	0	4	1.5	No			No			Yes	0.5	33.30%	No			Yes	0.5	33.30%
168403	22/12/2020 10:50	35.55657167	0.332393333	2695.1	Questionnaire	Farming		Gladys	Elgeiyo Marakwet	Keiyo South	Chepkorio	Nyaru	Kapcheptek	Kapcheptek	Gladys kiriswa	Justus eregae	723805913	Sarah jepkoech	728076797	Female	28	Spouse	Married	Secondary	Crop farmer	Male headed, female managed	No	6	Kalenjin	1	1	3	5	1	No			No			Yes	0.5	50.00%	No			Yes	0.5	50.00%
169117	22/12/2020 10:49	35.53123	0.479896667	2589.7	Questionnaire	farming		Karen	Elgeiyo Marakwet	Keiyo South	Kaptarakwa	Kitany	Kitany	Kitany	Caren	Justus		Mary chebii	720106260	Female	50	Parent	Married	Postgraduate	Crop farmer	Male headed, female managed	No	20	Kalenjin	2	2	1	7	4	No			No			Yes	3	75.00%	No			Yes	0.33	8.30%
168439	22/12/2020 10:25	35.56533167	0.247341667	2477.3	Questionnaire	mixed farming		Emmanuel Barmao	Elgeiyo Marakwet	Keiyo South	Kabiemit	Tumeiyo	Tambul	Kimwogo	Barmao Emmanuel	Justus	723805913	cheboi	720778684	Male	47	HH(Self)	Married	Secondary	Crop farmer	Male headed, male managed	Yes	47	Kalenjin	2	1	6	9	10.25	No			Yes	2	19.50%	Yes	0.5	4.90%	No			No
168404	22/12/2020 10:15	35.55926167	0.330595	2680.4	Questionnaire	Farming		Gladys	Elgeiyo Marakwet	Keiyo South	Chepkorio	Nyaru	Kapcheptek	Kapcheptek	Gladys kiriswa	Justus eregae	723805913	Fridah ronoh	719229032	Female	35	Spouse	Married	Secondary	Crop farmer	Male headed, male managed	No	10	Kalenjin	1	1	3	5	1.25	No			No			Yes	0.5	40.00%	No			Yes	0.5	40.00%
169118	22/12/2020 10:05	35.53088	0.475636667	2591.5	Questionnaire	farming		Karen	Elgeiyo Marakwet	Keiyo South	Kaptarakwa	Kitany	Kitany	Kiabori	Caren	justus		Christina kipsait		Female	55	Parent	Widowed	Primary	Crop farmer	Female headed, female managed	No	35	Kalenjin	1	5	3	7	6.5	No			Yes	0.33	5.10%	Yes	0.5	7.70%	No			Yes	0.33	5.10%
168440	22/12/2020 9:40	35.56538	0.247235	2471.8	Questionnaire	mixed farming		Emmanuel Barmao	Elgeiyo Marakwet	Keiyo South	Kabiemit	Tumeiyo	Tambul	Kimwogo	Barmao Emmanuel	Justus	723805913	kiprop	723149205	Male	30	HH(Self)	Married	Primary	Crop farmer	Male headed, male managed	Yes	30	Kalenjin	1	1	5	7	8	No			Yes	1	12.50%	Yes	2	25.00%	No			Yes	0.75	9.40%
169119	22/12/2020 9:37	35.53569667	0.476823333	2579.1	Questionnaire	farming		Karen	Elgeiyo Marakwet	Keiyo South	Kaptarakwa	Kitany	Kitany	Kimamoi	Caren	Justus		patirick yator	708536849	Male	36	Parent	Married	Primary	Crop farmer	Male headed, male managed	Yes	36	Kalenjin	1	1	2	4	4	No			Yes	0.33	8.30%	Yes	0.5	12.50%	No			Yes	0.33	8.30%
168405	22/12/2020 9:36	35.55955667	0.330423333	2688.8	Questionnaire	Farming		Gladys	Elgeiyo Marakwet	Keiyo South	Chepkorio	Nyaru	Kapcheptek	Kapcheptek	Gladys kiriswa	Justus eregae	723805913	Stanley mosii	724612010	Male	65	HH(Self)	Married	Tertiary	Retired(pensioner)	Male headed, male managed	No	40	Kalenjin	5	4	0	9	5	No			No			Yes	1	20.00%	No			Yes	1	20.00%
169120	22/12/2020 9:17	35.53353	0.476451667	2589	Questionnaire	farming		Karen	Elgeiyo Marakwet	Keiyo South	Kaptarakwa	Kitany	Kitany	Kiabori	Caren	justus		Anita cheruyot	712547799	Female	34	Parent	Married	Primary	Crop farmer	Male headed, female managed	No	11	Kalenjin	2	2	4	6	4	No			Yes	0.25	6.30%	Yes	0.25	6.30%	No			Yes	0.33	8.30%
168406	22/12/2020 8:58	35.56015167	0.329576667	2688.5	Questionnaire	Farming		Gladys	Elgeiyo Marakwet	Keiyo South	Chepkorio	Nyaru	Kapcheptek	Kapcheptek	Gladys kiriswa	Justus eregae	723805913	Josephine kemboi	703254793	Female	34	Spouse	Married	Secondary	Crop farmer	Male headed, male managed	Yes	34	Kalenjin	1	1	5	7	1.5	No			No			Yes	0.5	33.30%	No			Yes	0.5	33.30%
169121	22/12/2020 8:52	35.54895833	0.46433	2618.6	Questionnaire	farming		Karen	Elgeiyo Marakwet	Keiyo South	Kaptarakwa	Kaptarakwa	Mokwo	Singore	Caren	Justus		veronica jeruto	799084249	Female	27	Parent	Married	Primary	Crop farmer	Male headed, female managed	No	2	Kalenjin	2	1	3	5	5	No			Yes	0.25	5.00%	Yes	4.75	95.00%	No			No
168442	22/12/2020 8:52	35.55867667	0.240893333	2494.8	Questionnaire	farming		Emmanuel Barmao	Elgeiyo Marakwet	Keiyo South	Maoi	Kapkitony	Kipkamwo	Sirek	Barmao Emmanuel	Justus eragae	723805913		700507756	Female	27	Child	Single	Tertiary	None	Male headed, male managed	Yes	27	Kalenjin						No			No			No			No			Yes	0.8
169122	22/12/2020 8:29	35.54492833	0.464425	2609.2	Questionnaire	farming		Karen	Elgeiyo Marakwet	Keiyo South	Kaptarakwa	Kaptarakwa	Mokwo	Singore	Caren	justus		lidya jesang	715600646	Female	34	Parent	Widowed	Secondary	Crop farmer	Female headed, female managed	No	34	Kalenjin	2	2	1	7	1.5	No			Yes	0.33	22.20%	Yes	0.25	16.70%	No			Yes	0.33	22.20%
168407	22/12/2020 8:27	35.56016333	0.329546667	2692.6	Questionnaire	Farming		Gladys	Elgeiyo Marakwet	Keiyo South	Chepkorio	Nyaru	Kapcheptek	Kapcheptek	Gladys kiriswa	Justus eregae	723805913	Bernard kipchumba	725584135	Male	30	HH(Self)	Married	Primary	Crop farmer	Male headed, male managed	Yes	30	Kalenjin	1	1	0	2	1	No			No			Yes	0.5	50.00%	No			Yes	0.5	50.00%
168117	21/12/2020 17:17	35.555115	0.465185	2643	Questionnaire	farming		Karen	Elgeiyo Marakwet	Keiyo South	Kaptarakwa	Kaptarakwa	Mokwo	Singore	Caren	justus		Mary sinye	720586639	Female	73	Parent	Widowed	Primary	Crop farmer	Female headed, female managed	Yes	73	Kalenjin	1	1	1	5	10.5	No			Yes			Yes			No			Yes	0.25	2.40%
168128	21/12/2020 17:07	35.539235	0.245565	2553.8	Questionnaire	mixed farming		Emmanuel Barmao	Elgeiyo Marakwet	Keiyo South	Kabiemit	Tumeiyo	Chepkosom	Siliboi	Barmao Emmanuel	Justus eragae	723805913	rael	726043711	Male	45	Spouse	Married	Secondary	Crop farmer	Male headed, male managed	Yes	45	Kalenjin	3	1	3	3	16	Yes	1	6.30%	Yes	1	6.30%	Yes	4	25.00%	No			Yes	1	6.30%
168123	21/12/2020 16:28	35.555745	0.463061667	2643.7	Questionnaire	farming		Karen	Elgeiyo Marakwet	Keiyo South	Kaptarakwa	Kaptarakwa	Mokwo	Kapket	Caren	justus		Sarah kiplagat		Female	63	Parent	Married	Primary	Crop farmer	Male headed, female managed	No	40	Kalenjin	0	1	0	3	6				Yes	2	33.30%	Yes	0.25	4.20%	No			Yes	0.25	4.20%
168129	21/12/2020 16:23	35.53929833	0.24554	2558	Questionnaire	mixed farming		Emmanuel Barmao	Elgeiyo Marakwet	Keiyo South	Kabiemit	Tumeiyo	Chepkosom	Siliboi	Barmao Emmanuel	Justus eragae	723805913		725682987	Male	28	HH(Self)	Married	Primary	Crop farmer	Male headed, male managed	Yes	28	Kalenjin			2	4	2.25	No			No			Yes	0.5	22.20%	No			Yes	0.13	5.60%
168122	21/12/2020 15:35	35.551855	0.461231667	2636.3	Questionnaire	farming		Karen	Elgeiyo Marakwet	Keiyo South	Kaptarakwa	Kaptarakwa	Mokwo	Kapket	Caren	justus		Hillary kipmutai	799201333	Male	32	Parent	Married	Primary	Crop farmer	Male headed, female managed	Yes	32	Kalenjin	3	1	3	5	1	No			Yes	0.25	25.00%	Yes	0.25	25.00%	No			No
168130	21/12/2020 14:57	35.549825	0.233165	2513.4	Questionnaire	mixed farming		Emmanuel Barmao	Elgeiyo Marakwet	Keiyo South	Kabiemit	Tumeiyo	Tumeiyo	Kewapsui	Barmao Emmanuel	Justus	723805913	Daniel arusei	729812382	Male	38	HH(Self)	Married	Secondary	Crop farmer	Male headed, male managed	Yes	38	Kalenjin	1	1	4	6	5.5	No			Yes	1	18.20%	Yes	4	72.70%	No			Yes	0.13	2.30%
168121	21/12/2020 14:51	35.54569833	0.460735	2624.7	Questionnaire	farming		Karen	Elgeiyo Marakwet	Keiyo South	Kaptarakwa	Kaptarakwa	Mokwo	Bararike	Caren	justud		talai kututi		Female	72	Parent	Widowed	Primary	Crop farmer	Female headed, female managed	No	51	Kalenjin	0	1	0	2	5	No			No			Yes	3	60.00%	No			Yes	0.33	6.70%
168191	21/12/2020 14:41	35.420635	0.469195	2312.3	Questionnaire	farmer		Oliver	Uasingishu	Ainabkoi	Kaptagat	Kaptagat	Lotonyok	Chamyet	Oliver Lelan	justus		kimeliel		Male	64	HH(Self)	Married	Secondary	Crop farmer	Male headed, male managed	No	50	Kalenjin	3	2		5	100	No			Yes	10	10.00%	Yes	20	20.00%	No			No
168131	21/12/2020 14:00	35.551815	0.235303333	2475.8	Questionnaire	mixed farming		Emmanuel Barmao	Elgeiyo Marakwet	Keiyo South	Kabiemit	Tumeiyo	Tumeiyo	Kewapsui	Barmao Emmanuel	Justus	723805913	Dan	724089052	Male	38	HH(Self)	Married	Tertiary	Jua kali/craftsman	Male headed, male managed	Yes	38	Kalenjin	1	1	2	4	2.25	No			Yes	0.25	11.10%	Yes	1	44.40%	No			Yes	0.13	5.60%
168132	21/12/2020 13:21	35.551785	0.23521	2483.1	Questionnaire	mixed farming	barmao	Emmanuel Barmao	Elgeiyo Marakwet	Keiyo South	Kabiemit	Tumeiyo	Tumeiyo	Kewapsui	Barmao Emmanuel	Justus	723805913		728463643	Male	32	Child	Married	Secondary	Crop farmer	Female headed, female managed	Yes	32	Kalenjin	2	1	3	6	5	No			No			Yes	1	20.00%	No			Yes	0.13	2.50%
168192	21/12/2020 12:59	35.38738833	0.494106667	2243.9	Questionnaire	farmer		Oliver	Uasingishu	Ainabkoi	Kaptagat	Kaptagat	Lotonyok	Lotonyok	Oliver Lelan	justus			7213321456	Female	32	Spouse	Married	Secondary	Crop farmer	Male headed, female managed	No	5	Kalenjin	1	2	1	3	3	No			No			Yes	2	66.70%	No			No
168496	21/12/2020 12:43	35.39622667	0.482773333	2272.9	Questionnaire	farmer		Oliver	Uasingishu	Ainabkoi	Kaptagat	Kaptagat	Lotonyok	Kwenfarm	Oliver Lelan	justus			715020554	Female	43	HH(Self)	Married	Secondary	Crop farmer	Male headed, female managed	Yes	43	Kalenjin	1	3		4	3	No			Yes	0.5	16.70%	Yes	1.5	50.00%	No			No
168115	21/12/2020 12:36	35.54073	0.460126667	2592.6	Questionnaire	farming		Karen	Elgeiyo Marakwet	Keiyo South	Kaptarakwa	Kaptarakwa	Mokwo	Bararike	Caren			rosalina kurgat		Female	63	Parent	Widowed	Primary	Crop farmer	Female headed, female managed	No	47	Kalenjin	3	1	4	8	4				Yes	0.25	6.30%	Yes	0.5	12.50%	No			No
168497	21/12/2020 12:35	35.400395	0.492463333	2266.9	Questionnaire	working		Oliver	Uasingishu	Ainabkoi	Kaptagat	Kaptagat	Lotonyok	Kwenfarm	Oliver Lelan	justus			724460264	Male	42	HH(Self)	Married	Secondary	Business	Male headed, female managed	Yes	42	Kalenjin	3	4	0	7	7	No			Yes	1	14.30%	Yes	2	28.60%	No			No
168498	21/12/2020 12:29	35.40738667	0.488831667	2272.8	Questionnaire	farmer		Oliver	Uasingishu	Ainabkoi	Kaptagat	Kaptagat	Lotonyok	Kwenfarm	Oliver Lelan	justus		kirara		Male	52	HH(Self)	Married	Primary	Crop farmer	Male headed, male managed	Yes	52	Kalenjin	3	2	0	5	5	No			Yes	0.5	10.00%	Yes	1.5	30.00%	No			No
168133	21/12/2020 12:24	35.55357833	0.23452	2510.5	Questionnaire	mixed farming	barmao	Emmanuel Barmao	Elgeiyo Marakwet	Keiyo South	Kabiemit	Tumeiyo	Tumeiyo	Kewapsui	Barmao Emmanuel	Justus	723805913	Duncan rutto	768335776	Male	27	Child	Single	Tertiary	Retired(pensioner)	Male headed, male managed	Yes	27	Kalenjin	1	1	2	5	32	No			Yes	2	6.30%	Yes	0.25	0.80%	No			Yes
168197	21/12/2020 12:24	35.41150667	0.484881667	2271.5	Questionnaire	farmer		Oliver	Uasingishu	Ainabkoi	Kaptagat	Kaptagat	Lotonyok	Kwenfarm	Oliver Lelan	justus		kosumen		Male	37	HH(Self)	Married	Primary	Salaried/employed	Male headed, female managed	Yes	37	Kalenjin	1	1	3	5	2	No			No			Yes	1	50.00%	No
168196	21/12/2020 12:16	35.418345	0.487195	2300.3	Questionnaire	driver		Oliver	Uasingishu	Ainabkoi	Kaptagat	Kaptagat	Lotonyok	Kwenfarm	Oliver Lelan	justus				Female	50	Spouse	Married	Secondary	Crop farmer	Male headed, female managed	Yes	50	Kalenjin	3	2	0	5	5	No			No			Yes	2	40.00%	Yes	0.25	5.00%	No
168102	21/12/2020 12:02	35.42488	0.496215	2294	Questionnaire	working		Oliver	Uasingishu	Ainabkoi	Kaptagat	Kaptagat	Tendwo	Kaptich	Oliver Lelan	justus		keter		Male	62	HH(Self)	Married	Primary	Crop farmer	Male headed, male managed	No	40	Kalenjin	3	1	0	4	10	Yes	2	20.00%	Yes	3	30.00%	Yes	3	30.00%	No			No
168097	21/12/2020 11:50	35.43372667	0.495508333	2307.4	Questionnaire	fermer		Oliver	Uasingishu	Ainabkoi	Kaptagat	Kaptagat	Tendwo	Kaptich	Oliver Lelan	justus				Male	52	HH(Self)	Married	Tertiary	Crop farmer	Male headed, male managed	No	20	Kalenjin	3	3	0	6	5	No			Yes	1	20.00%	Yes	2	40.00%	No			No
168119	21/12/2020 11:46	35.53989	0.462451667	2599.2	Questionnaire	farming		Karen	Elgeiyo Marakwet	Keiyo South	Kaptarakwa	Kaptarakwa	Kaptarakwa	Bararike	Caren			Paul kipsang		Male	56	Parent	Married	Primary	Crop farmer	Male headed, female managed	Yes	56	Kalenjin	1	0	1	3	7				Yes	0.25	3.60%	Yes	1	14.30%	No			No	0.25	3.60%
168096	21/12/2020 11:44	35.43685167	0.495083333	2318	Questionnaire	farmer		Oliver	Uasingishu	Ainabkoi	Kaptagat	Kaptagat	Tendwo	Kaptich	Oliver Lelan	justus				Male	54	HH(Self)	Married	Secondary	Salaried/employed	Male headed, male managed	Yes	54	Kalenjin	2	3	2	5	8	No			Yes	2	25.00%	Yes	5	62.50%	No			No
168134	21/12/2020 11:39	35.553555	0.23457	2508	Questionnaire	mixed farming		Emmanuel Barmao	Elgeiyo Marakwet	Keiyo South	Kabiemit	Tumeiyo	Tumeiyo	Masamba	Barmao Emmanuel	Justus	723805913	kipsos	728844169	Male	30	HH(Self)	Married	Secondary	Crop farmer	Male headed, male managed	Yes	30	Kalenjin	1	1	3	4	5	No			Yes	1	20.00%	Yes	2	40.00%	No			Yes	0.13	2.50%
168095	21/12/2020 11:39	35.44373333	0.493668333	2336.8	Questionnaire	farmer	oliver	Oliver	Uasingishu	Ainabkoi	Kaptagat	Kaptagat	Tendwo	Tendwo	Oliver Lelan	justus				Female	55	HH(Self)	Single	Secondary	Crop farmer	Female headed, female managed	Yes	55	Kalenjin	2	3	0	5	40	Yes	4	10.00%	Yes	4	10.00%	Yes	10	25.00%	No			No
168026	21/12/2020 11:26	35.435	0.481371667	2321.3	Questionnaire	business		Oliver	Uasingishu	Ainabkoi	Kaptagat	Kaptagat	Tendwo	Kapsetet	Oliver Lelan	justus		ben		Male	68	HH(Self)	Married	Secondary	Business	Male headed, male managed	Yes	68	Kalenjin	4	4	3	8	12	No			Yes	2	16.70%	Yes	5	41.70%	No			No
168025	21/12/2020 11:19	35.43682167	0.47657	2308.9	Questionnaire	farmer		Oliver	Uasingishu	Ainabkoi	Kaptagat	Kaptagat	Tendwo	Kapsetet	Oliver Lelan	justus			722308139	Male	37	HH(Self)	Married	Tertiary	Salaried/employed	Male headed, male managed	Yes	37	Kalenjin	1	4	3	5	6	No			Yes	1	16.70%	Yes	5	83.30%	No			No
168135	21/12/2020 11:08	35.54990333	0.244051667	2502	Questionnaire	farming		Emmanuel Barmao	Elgeiyo Marakwet	Keiyo South	Kabiemit	Tumeiyo	Tumeiyo	Masamba	Barmao Emmanuel	Justus	723805913	irene	724942272	Female	36	Spouse	Married	Primary	Crop farmer	Male headed, female managed	Yes	36	Kalenjin	1	1	6	8	2	No			No			Yes	1	50.00%	No			Yes	0.33	16.70%
168120	21/12/2020 10:26	35.534275	0.466425	2592.5	Questionnaire	farming		Karen	Elgeiyo Marakwet	Keiyo South	Kaptarakwa	Kaptarakwa	Kaptarakwa	Kaptilol	Caren	justus		Richard maiyo		Male	52	Parent	Married	Primary	Crop farmer	Male headed, female managed	Yes	52	Kalenjin	3	3	8	8	11.25	No			Yes	0.25	2.20%	Yes	0.5	4.40%	No			Yes	0.25	2.20%
168116	21/12/2020 9:31	35.53614333	0.465616667	2593	Questionnaire	farming		Karen	Elgeiyo Marakwet	Keiyo South	Kaptarakwa	Kaptarakwa	Kaptarakwa	Kaptilol	Caren	Justus		Irene kiptanui		Female	66	Parent	Married	Primary	Crop farmer	Male headed, female managed	No	44	Kalenjin	3	1	7	10	2	No			Yes	0.5	25.00%	Yes	0.5	25.00%	No			Yes	0.33	16.70%
168136	21/12/2020 9:09	35.549095	0.244218333	2509	Questionnaire	farming		Emmanuel Barmao	Elgeiyo Marakwet	Keiyo South	Kabiemit	Tumeiyo	Tumeiyo	Tulwobei	Barmao Emmanuel	Justus eragae	723805913	kipkoech	726408206	Male	26	Child	Single	Tertiary	Crop farmer	Male headed, male managed	Yes	26	Kalenjin	2	1	4	8	10.25	No			No			Yes	1	9.80%	No			Yes	0.8	7.80%
168118	21/12/2020 8:23	35.53701667	0.463876667	2602.3	Questionnaire	partial farming		Karen	Elgeiyo Marakwet	Keiyo South	Kaptarakwa	Kaptarakwa	Kaptarakwa	Kaptilol	Caren	justus				Female	46	Parent	Married	Tertiary	Crop farmer	Male headed, female managed	No	25	Kalenjin	2	4	6	8	1.5	No			No			Yes	0.5	33.30%	Yes	0.25	16.70%	No
167501	19/12/2020 17:15	35.43355	0.530868333	2311.6	Questionnaire	farmer	oliver	Oliver	Uasingishu	Moiben	Tembelio	Elgeiyo border	Elgeiyo border	Kapsosio	Oliver Lelan	justus				Female	48	HH(Self)	Widowed	Primary	Crop farmer	Female headed, female managed	Yes	48	Kalenjin	1	2	0	3	10	No			Yes	2	20.00%	Yes	4	40.00%	No			No
167502	19/12/2020 12:15	35.437435	0.52441	2323.7	Questionnaire	working		Oliver	Uasingishu	Moiben	Tembelio	Tembelio	Elgeiyo border	Elgeiyo border	Oliver Lelan	justus				Female	52	HH(Self)	Single	Secondary	Salaried/employed	Female headed, female managed	No	10	Kalenjin	3	2	1	5	8	No			Yes	2	25.00%	Yes	3	37.50%	No			No
167360	18/12/2020 16:44	35.462475	0.464776667	2408.3	Questionnaire	business		Oliver	Uasingishu	Ainabkoi	Kaptagat	Kaptagat	Tendwo	Bombo	Oliver Lelan	justus			725804230	Male		HH(Self)	Married	Secondary	Business	Male headed, male managed	Yes		Kalenjin	1	2	1	3	4	No			No			No			No			No
167010	17/12/2020 17:55	35.45488167	0.493233333	2365	Questionnaire	working		Oliver	Uasingishu	Ainabkoi	Kaptagat	Kaptagat	Tendwo	Kapchesorom	Oliver Lelan	Justus	0		724396908	Male	42	HH(Self)	Married	Secondary	Salaried/employed	Male headed, male managed	Yes	42	Kalenjin	1	5	4	6	2	No			No			Yes	1.5	75.00%	No			No
167018	17/12/2020 16:41	35.46882	0.39966	2408.9	Questionnaire	farming		Duncan Kipkogei	Uasingishu	Ainabkoi	Kaptagat	Kipsinende	Cheptigit	Mlimani	Duncan Kemboi	Justus eragae	723805913	Bernard	725563588	Male	28	Child	Single	Undergraduate	Crop farmer	Male headed, male managed	Yes	28	Kalenjin	3	3	1	6	10.5	No			Yes	0.5	4.80%	Yes	2	19.00%	No			Yes	0.5	4.80%
167019	17/12/2020 15:37	35.46720833	0.399605	2402.3	Questionnaire	farmer		Duncan Kipkogei	Uasingishu	Ainabkoi	Kaptagat	Kipsinende	Cheptigit	Cheptigit	Duncan Kemboi	Justus eregae	723805913	Sophia kiptum		Female	44	Parent	Married	Secondary	Crop farmer	Male headed, male managed	No	15	Kalenjin	1	1	5	7	2.5	No			No			Yes	1	40.00%	No			Yes	0.25	10.00%
167011	17/12/2020 14:37	35.48800833	0.378506667	2453.6	Questionnaire	Farming		Gladys	Elgeiyo Marakwet	Keiyo South	Chepkorio	Flax	Chepkorio	Koibarak	Gladys kiriswa	Justus eregae	723805913	Scovia atyang	715627053	Female	32	Spouse	Married	Primary	Crop farmer	Male headed, male managed	No	6	others	1	1	4	6	4.5	No			No			No			No			Yes	0.5	11.10%
167012	17/12/2020 13:54	35.48741167	0.378328333	2445.7	Questionnaire	Farming		Gladys	Elgeiyo Marakwet	Keiyo South	Chepkorio	Flax	Flax	Koibarak	Gladys kiriswa	Justuseregae	723805913	Emily kigen		Female	85	Parent	Married	Primary	Crop farmer	Male headed, male managed	No	50	Kalenjin	2	2	5	9	70	No			No			Yes	3	4.30%	Yes	6	8.60%	Yes	5	7.10%
167013	17/12/2020 13:19	35.486195	0.376943333	2445.4	Questionnaire	Farming		Gladys	Elgeiyo Marakwet	Keiyo South	Chepkorio	Flax	Flax	Koibarak	Gladys kiriswa	Justus eregae	723805913	Janet Kipchirchir	708808524	Female	26	Spouse	Married	Primary	Crop farmer	Male headed, male managed	No	1	Kalenjin	2	1	2	5	2	No			No			Yes	1	50.00%	No			Yes	0.5	25.00%
166989	17/12/2020 13:00	35.45947167	0.475595	2381.7	Questionnaire	farming	oliver	Oliver	Uasingishu	Ainabkoi	Kaptagat	Kaptagat	Tendwo	Kokwet	Oliver Lelan	justus			721267820	Male	45	HH(Self)		Secondary	Crop farmer	Male headed, male managed	Yes	45	Kalenjin	2	4	3	6	6	Yes	0.5	8.30%	Yes	0.5	8.30%	Yes	2	33.30%	No			No
166996	17/12/2020 12:39	35.46207667	0.412025	2393.2	Questionnaire	farmer		Duncan Kipkogei	Uasingishu	Ainabkoi	Kaptagat	Kipsinende	Cheptigit	Mereon	Duncan Kemboi	Justus eregae	723805913	Kemboi	719607075		41	Parent	Married	Tertiary	Crop farmer	Male headed, male managed	Yes	41	Kalenjin	1	2	2	5	1	No			No			Yes	0.5	50.00%	No			Yes	0.25	25.00%
167014	17/12/2020 12:30	35.48537333	0.376675	2460.3	Questionnaire	Farming		Gladys	Elgeiyo Marakwet	Keiyo South	Chepkorio	Flax	Flax	Koibarak	Gladys kiriswa	Justus eregae	723805913	Lonah chepchirchir	719580337	Female	26	Spouse	Married	Tertiary	Crop farmer	Male headed, male managed	No	1	Kalenjin	1	1	2	4	3.5	No			No			Yes	2	57.10%	No			Yes	0.5	14.30%
167015	17/12/2020 11:31	35.48416667	0.376853333	2433	Questionnaire	Farming		Gladys	Elgeiyo Marakwet	Keiyo South	Chepkorio	Flax	Flax	Koibarak	Gladys kiriswa	Justus eregae	723805913	Lenah kendi	70009792	Female	29	Spouse	Married	Secondary	Crop farmer	Male headed, male managed	No	5	Meru	4	1	1	7	3	No			No			Yes	2	66.70%	No			Yes	1	33.30%
166986	17/12/2020 11:10	35.44046	0.475156667	2336.8	Questionnaire	farming		Oliver	Uasingishu	Ainabkoi	Kaptagat	Kaptagat	Tendwo	Ngatit	Oliver Lelan	justus			722807203	Male	49	HH(Self)	Married	Secondary	Crop farmer	Male headed, male managed	Yes	49	Kalenjin	2	2	0	4	2	No			No			Yes	1.5	75.00%	No			No
166997	17/12/2020 10:51	35.462165	0.41198	2399.4	Questionnaire	farming		Duncan Kipkogei	Uasingishu	Ainabkoi	Kaptagat	Kipsinende	Cheptigit	Cheptigit	Duncan Kemboi	Justus Eregae	723	Kiprop biwot	700621442	Male	29	Child	Single	Secondary	Crop farmer	Male headed, male managed	Yes	29	Kalenjin	1	1	1	3	1	No			No			Yes	0.5	50.00%	No			Yes	0.25	25.00%
167016	17/12/2020 10:38	35.48252	0.37551	2429.8	Questionnaire	Farming		Gladys	Elgeiyo Marakwet	Keiyo South	Chepkorio	Flax	Flax	Koibarak	Gladys kiriswa	Justus eregae	723805913	Esther kotut	724248394	Female	49	Spouse	Married	Primary	Crop farmer	Male headed, male managed	Yes	49	Kalenjin	5	4	0	9	3	No			No			Yes	1	33.30%	No			Yes	0.5	16.70%
166998	16/12/2020 17:20	35.46029167	0.4095	2390.5	Questionnaire	farming		Duncan Kipkogei	Uasingishu	Ainabkoi	Kaptagat	Kipsinende	Cheptigit	Cheptigit	Duncan Kemboi	Justus Eregae		Damaris	769883931	Female	45	Parent	Married	Primary	Crop farmer	Male headed, female managed	No	12	Kalenjin	1	1	4	6	1	No			No			No			No			Yes	0.25	25.00%
166834	16/12/2020 15:33	35.47461667	0.426403333	2410	Questionnaire	Farming		Gladys	Elgeiyo Marakwet	Keiyo South	Kaptarakwa	Kaptarakwa	Kaptagat	Bondeni	Gladys kiriswa	Justuseregae	722601849	Wesley rotich	725568665	Male	35	HH(Self)	Married	Tertiary	Salaried/employed	Male headed, male managed	Yes	35	Kalenjin	4	3	0	7	3	No			No			Yes	1	33.30%	No			Yes	1	33.30%
166999	16/12/2020 14:50	35.46313333	0.410276667	2386.6	Questionnaire	farmer		Duncan Kipkogei	Uasingishu	Ainabkoi	Kaptagat	Kipsinende	Cheptigit	Cheptigit	Duncan Kemboi	Justus eregae	723805913	Peter kipchirchir	708143411	Male		Spouse	Married	Tertiary	Crop farmer	Male headed, male managed	No	2	Kalenjin	2	3	2	7	1	No			No			Yes	0.25	25.00%	Yes	0.25	25.00%	Yes	0.25	25.00%
166835	16/12/2020 14:08	35.47125	0.424521667	2418.5	Questionnaire	Farmer		Gladys	Elgeiyo Marakwet	Keiyo South	Kaptagat	Kaptarakwa	Kaptagat	Shopping centre	Gladys kiriswa	Justus eregae	722601849	Sally jeptoo	704263993	Female	26	Spouse	Married	Secondary	Business	Male headed, male managed	No	4	Kalenjin	1	1	1	3	0.5	No			No			No			No			Yes	0.25	50.00%
166983	16/12/2020 13:00	35.46280167	0.483328333	2392.5	Questionnaire	farming		Oliver	Uasingishu	Ainabkoi	Kaptagat	Kaptagat	Tendwo	Kapchesorom	Oliver Lelan	justus			714222696	Male		HH(Self)	Married	Tertiary	Crop farmer	Male headed, male managed	Yes		Kalenjin	6	5	8	12	22	No			Yes	1	4.50%	Yes	4	18.20%	Yes	3	13.60%	No
167000	16/12/2020 11:47	35.47272333	0.416251667	2416.5	Questionnaire	farmer		Duncan Kipkogei	Uasingishu	Ainabkoi	Kaptagat	Kipsinende	Cheptigit	Cheptigit	Duncan Kemboi	Eregae Justus	723805913	Jackson		Male	42	Parent	Married	Primary	Crop farmer	Male headed, male managed	Yes	42	Kalenjin	4	5	2	11	7	No			No			Yes	3	42.90%	Yes			Yes	0.25	3.60%
167001	16/12/2020 10:24	35.463475	0.4129	2395.8	Questionnaire	farmer		Duncan Kipkogei	Uasingishu	Ainabkoi	Kaptagat	Kipsinende	Cheptigit	Cheptigit	Duncan Kemboi	Justus Erekai	723805913		723622831	Male	29	HH(Self)	Married	Undergraduate	Business	Male headed, male managed	Yes	29	Kalenjin	2	1	0	3	8.5	No			Yes	1.5	17.60%	No			No			Yes	0.5	5.90%
166984	16/12/2020 10:18	35.45324333	0.494288333	2360.4	Questionnaire	farmeing		Oliver	Uasingishu	Ainabkoi	Kaptagat	Kaptagat	Tendwo	Kabitoi	Oliver Lelan	justus			726357396	Female	43	Spouse	Married	Tertiary	Salaried/employed	Male headed, male managed	Yes	43	Kalenjin	2	3	1	5	5.5	Yes	0.5	9.10%	No			Yes	2	36.40%	No			Yes	0.5	9.10%
[truncated: 82 more columns]
